# Supplementary material for: Female mice lacking Ftx lncRNA exhibit impaired X-chromosome inactivation and a microphthalmia-like phenotype
Source: PubMed Central journal article supplement (PMC6148026; doi:10.1038/s41467-018-06327-6), 2018-09-20
Supplement: 41467_2018_6327_MOESM1_ESM.pdf [file 41467_2018_6327_MOESM1_ESM.pdf]

Supplemental Information

**Female mice lacking *Ftx* lncRNA exhibit impaired X-chromosome inactivation and a microphthalmia-like phenotype**

Yusuke Hosoi, Miki Soma, Hirosuke Shiura, Takashi Sado, Hidetoshi Hasuwa, Kuniya Abe, Takashi Kohda, Fumitoshi Ishino, Shin Kobayashi

Supplementary Figure 1–12  
Supplementary Table 1 – 7  
Supplementary Data 1 and 2  
References

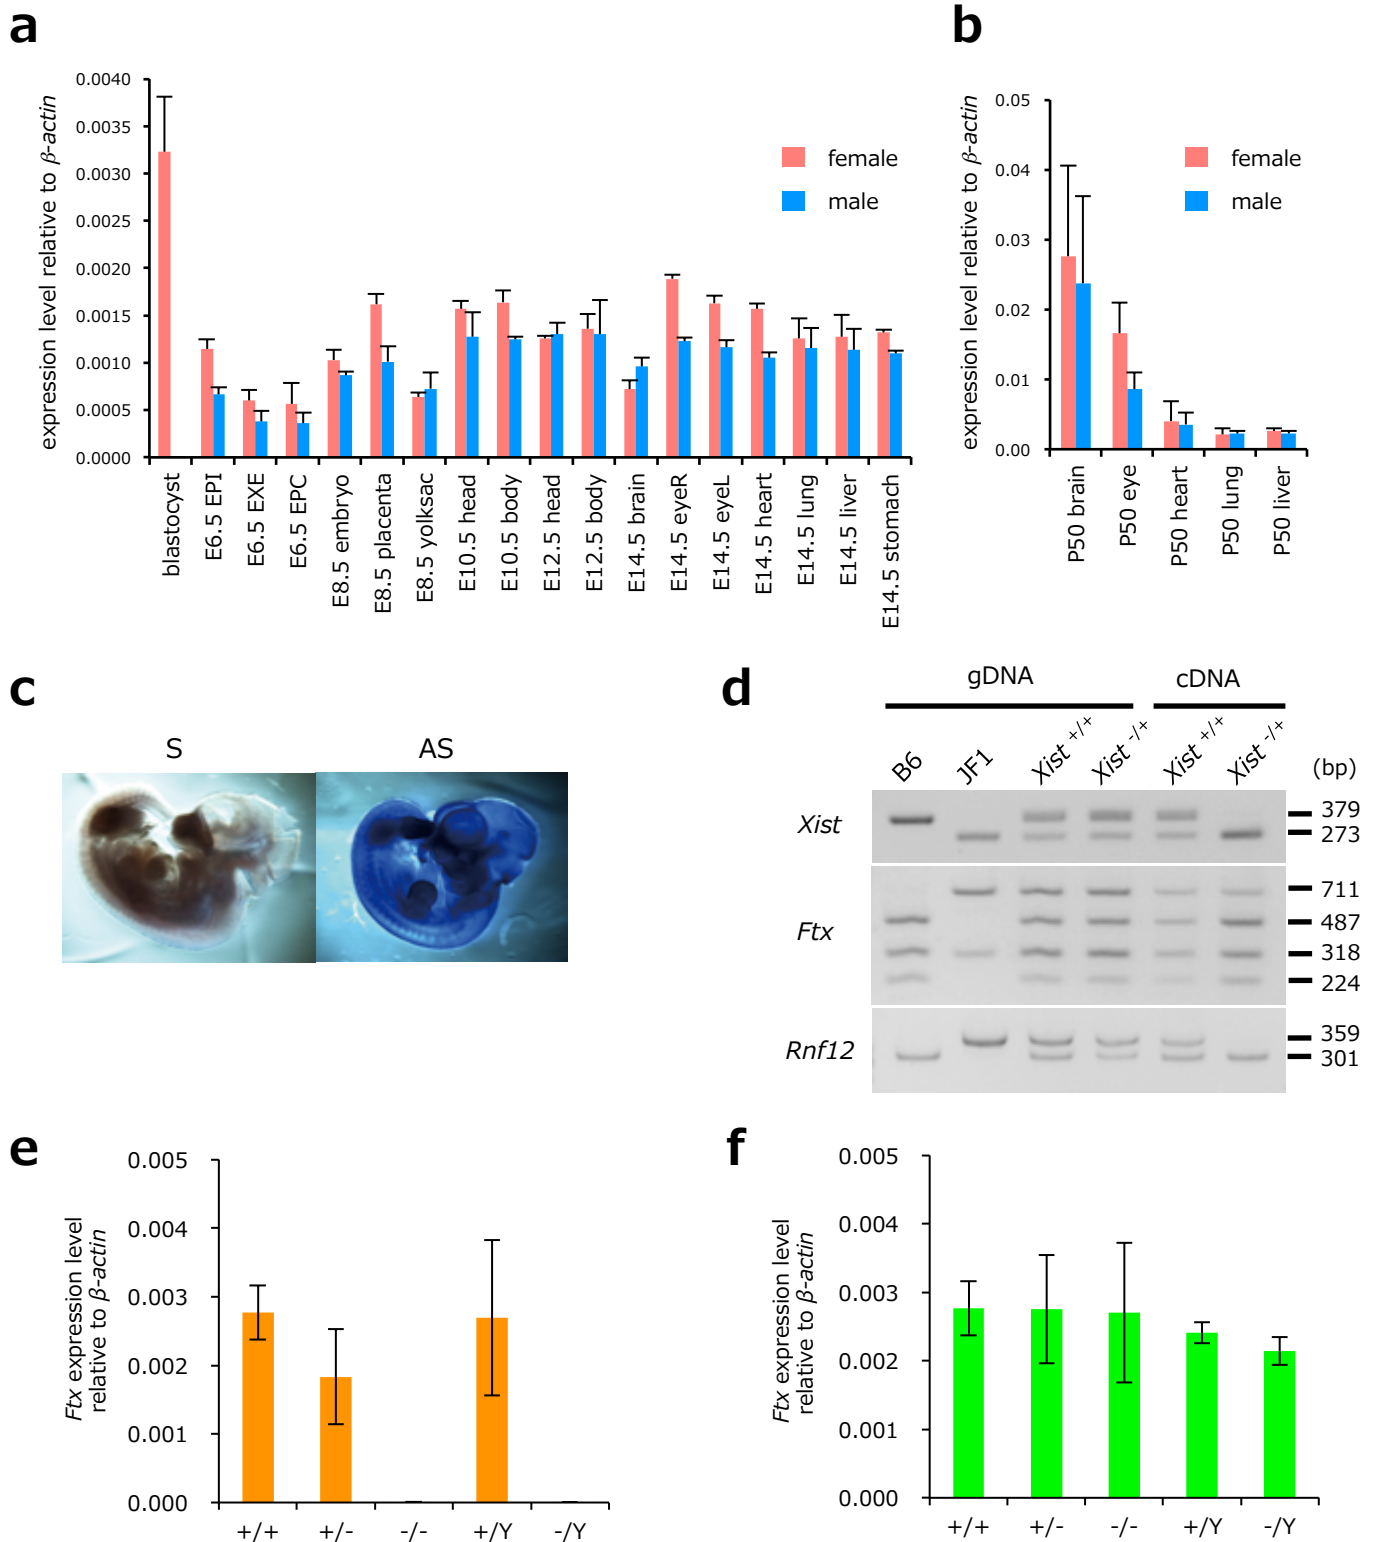

**Supplementary Figure 1. Expression of *Ftx* lncRNA in developing embryos and adult tissues.**

(a) RT-qPCR quantification of *Ftx* in developing male and female embryos ( $n = 3$ ).  $\beta$ -actin, beta-actin. Error bars, s.d. (b) RT-qPCR quantification of *Ftx* in adult male and female tissues ( $n = 3$ ). P, postnatal day. Error bars, s.d. (c) Whole-mount *in situ* hybridization of *Ftx* in an E11.5 embryo. Ubiquitous expression of *Ftx* was detected. AS, antisense strand probe; S, sense strand probe. (d) Allelic expression analysis of *Xist* and *Ftx* in *Xist*-deficient MEF cells (-B6/+JF1). *Ftx* escaped XCI and was biallelically expressed from both active and inactive X chromosomes. *Rnf12* subject to random XCI was used as a control. (e) *Ftx* expression was not detected in *Ftx*<sup>-/-</sup> mice. The expression levels of *Ftx* were quantified by RT-qPCR in adult kidneys ( $n = 3$  in each group) of wild-type females (+/+), heterozygous females (+/-), homozygous females (-/-), wild-type males (+/Y) and hemizygous males (-/Y). Error bars, s.d. (f) RT-qPCR quantification of *Ftx* in *miRNA374/421*-DKO mice. The expression levels of *Ftx* were quantified by RT-qPCR in adult kidneys ( $n = 3$  in each group) of WT females (+/+), heterozygous females (+/-), homozygous females (-/-), WT males (+/Y) and hemizygous males (-/Y). Error bars, s.d.

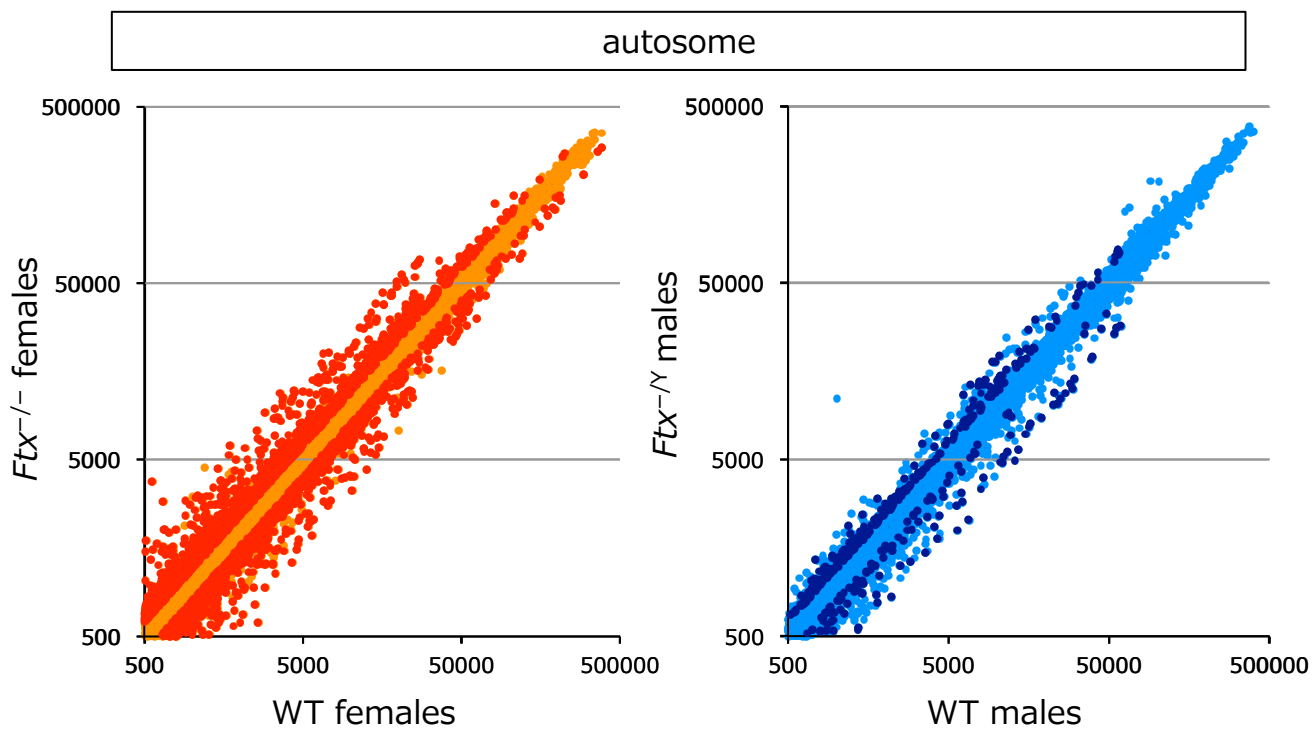

● All genes (signal intensity >500)

● FC>1.2 or FC<0.8 (T-test <0.05, signal intensity >500)

● All genes (signal intensity >500)

● FC>1.2 or FC<0.8 (T-test <0.05, signal intensity >500)

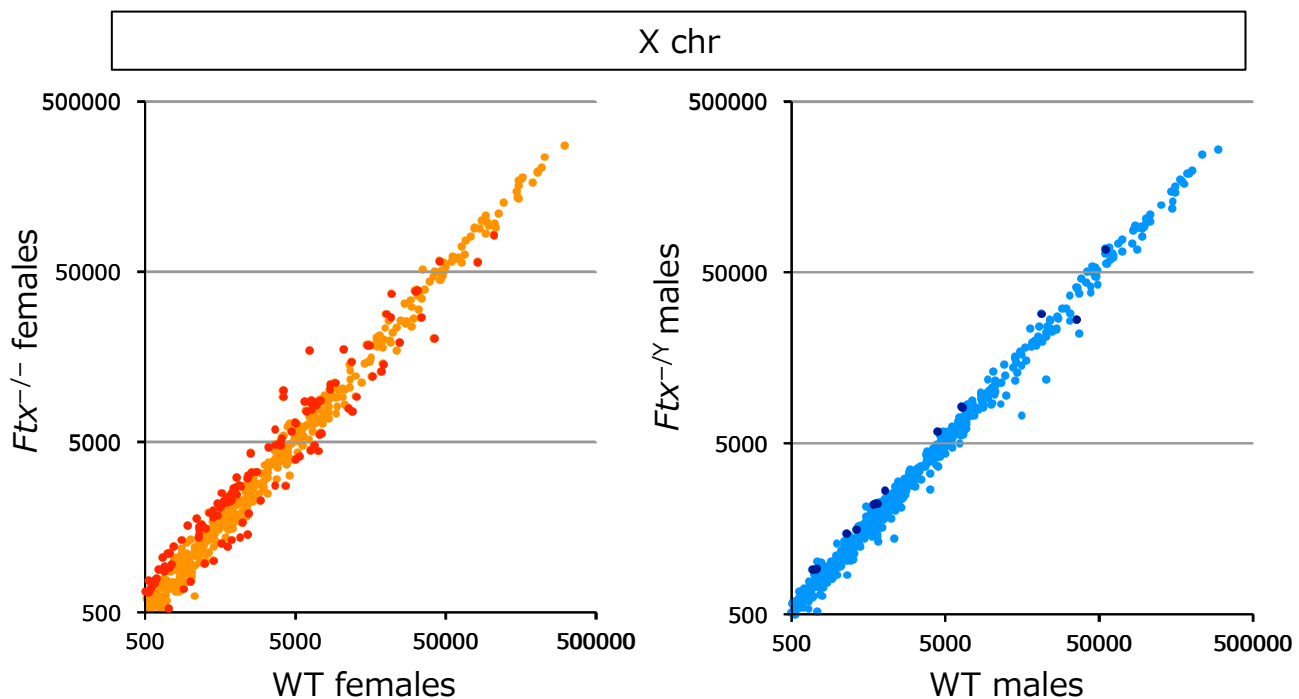

● All genes (signal intensity >500)

● FC>1.2 or FC<0.8 (T-test <0.05, signal intensity >500)

● All genes (signal intensity >500)

● FC>1.2 or FC<0.8 (T-test <0.05, signal intensity >500)

**Supplementary Figure 2. Microarray expression profiling.**

Scatter plot comparing wild-type and E13.5 *Ftx* mutant samples (upper, autosomal genes; lower, X-linked genes). All genes selected for this analysis showed a relative signal intensity of > 500 in female eyes in Agilent microarrays.

**a**

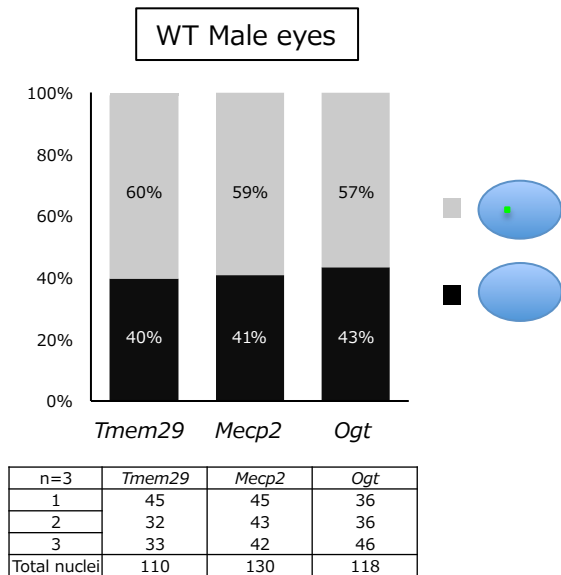

**b**

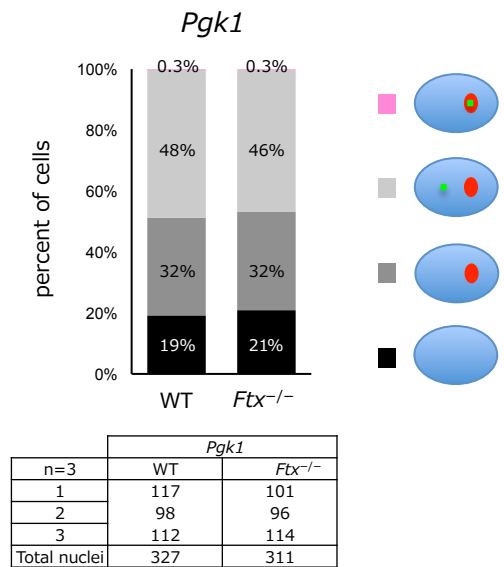

**c**

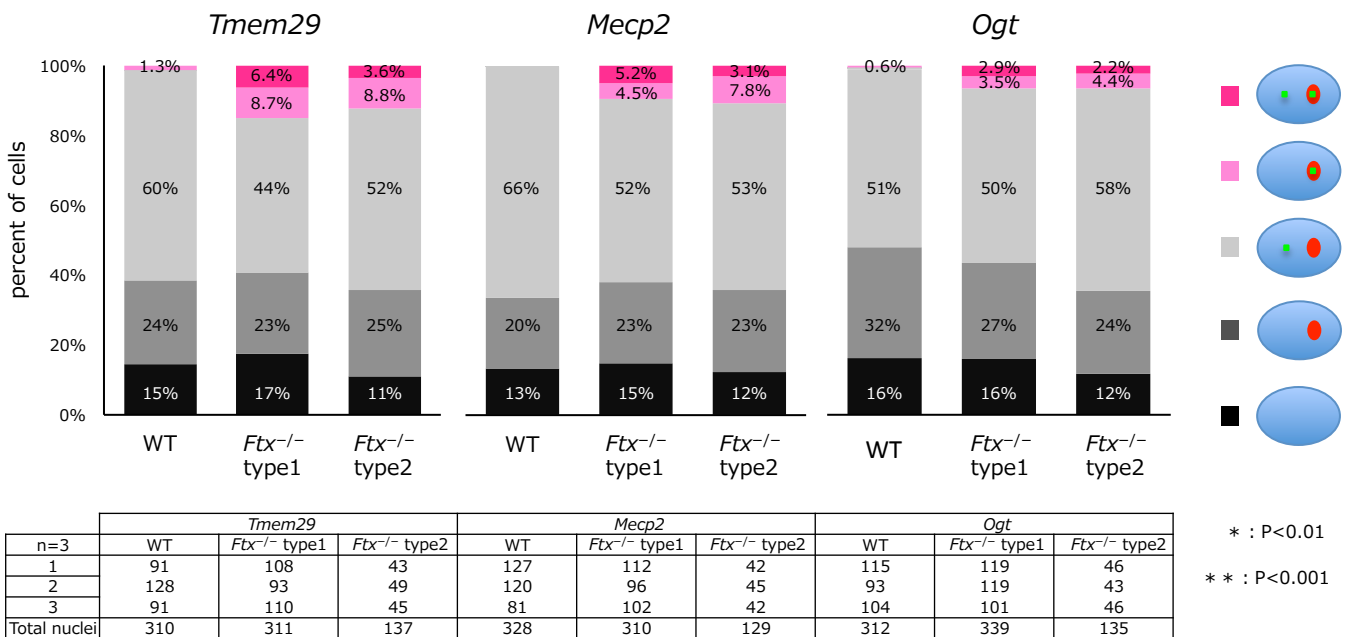

**Supplementary Figure 3. RNA-FISH analysis of eyes isolated from embryos at E13.5.**

(a) Summary of *Tmem29*, *Mecp2* and *Ogt* expressions in combination with *Xist* in male eyes. Approximately 40 nuclei in each eye were counted from three independent experiments and classified based on the patterns of *Xist* clouds and nascent X-linked gene transcripts. *Xist* signals were not observed in male eyes. (b) Summary of *Pgk1*: a non-upregulated gene in the microarray analysis. The prevalence of nuclei showing respective expression patterns of *Xist* clouds and nascent X-linked gene transcripts are depicted. Total cell numbers analysed in each embryo are shown in the table. No statistically significant differences between WT and *Ftx*<sup>-/-</sup> mice were observed for the non-upregulated gene *Pgk1*. (c) Summary of RNA-FISH analysis of the *Ftx*<sup>-/-</sup> type 2 eyes compared with WT, *Ftx*<sup>-/-</sup> type 1 eyes. RNA-FISH detected X-linked genes: *Tmem29*, *Mecp2*, and *Ogt*, in combination with *Xist*. Statistically significant differences between *Ftx*<sup>-/-</sup> type 1 and type 2 mice were not observed.

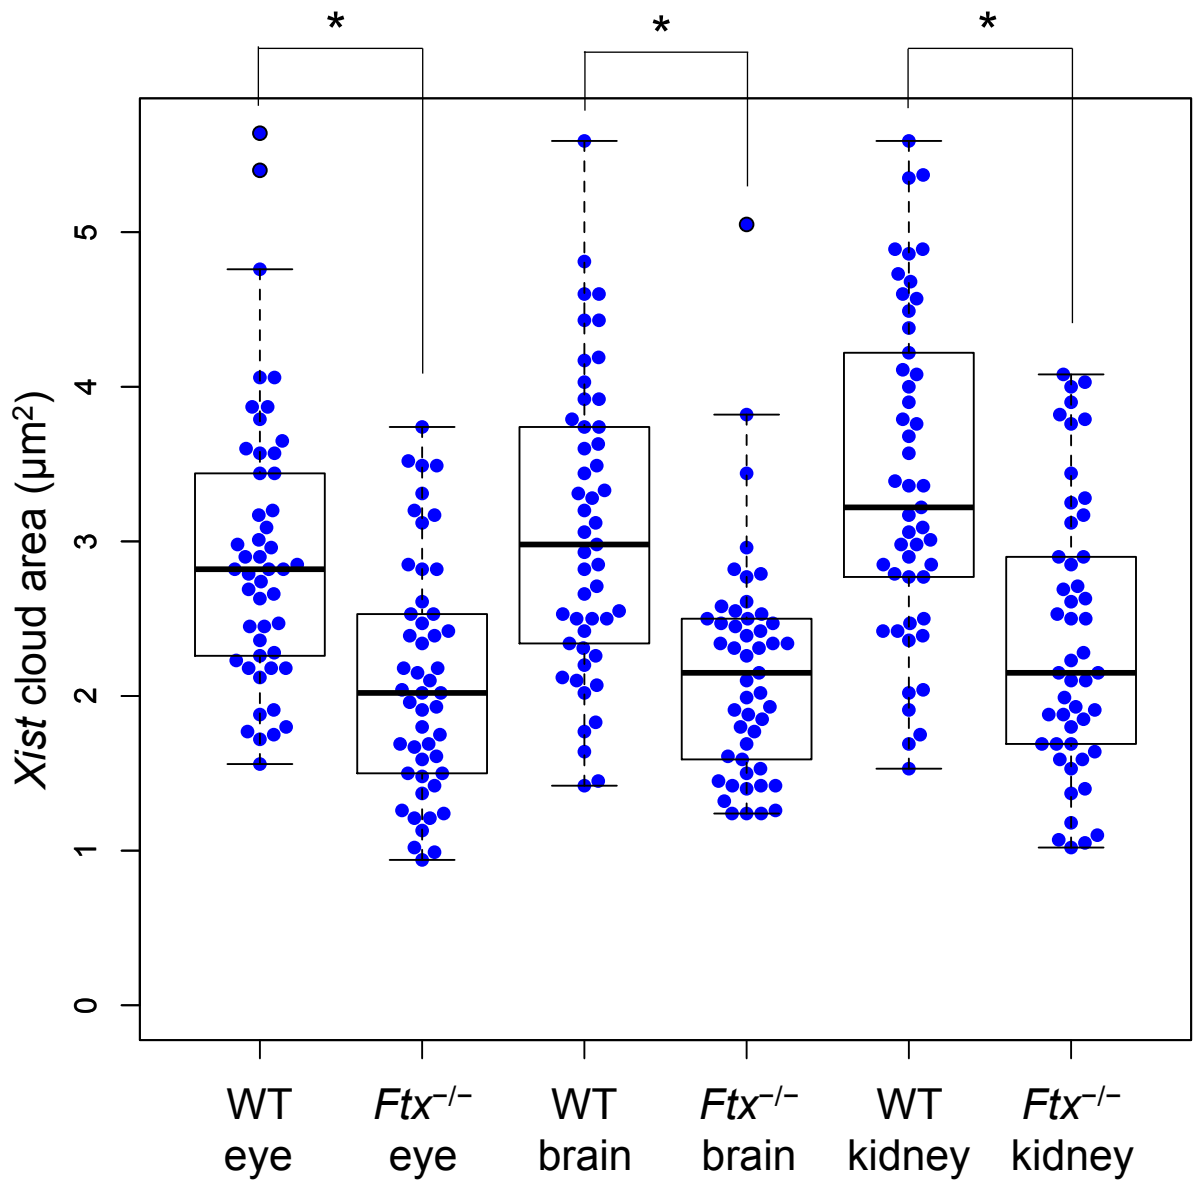

\* : P<0.01

**Supplementary Figure 4. The small *Xist* cloud detected in *Ftx*<sup>-/-</sup> embryos at E13.5.**

The size of the *Xist* cloud area in RNA-FISH was measured using Image J software; 50 nuclei were measured for each sample and the mean cloud area was significantly different between the *Ftx*<sup>-/-</sup> and WT embryos (two-tailed, unequal variance *t*-test). The box represents the median, 25<sup>th</sup> and 75<sup>th</sup> percentiles; whiskers indicate the maximum and minimum values.

**a**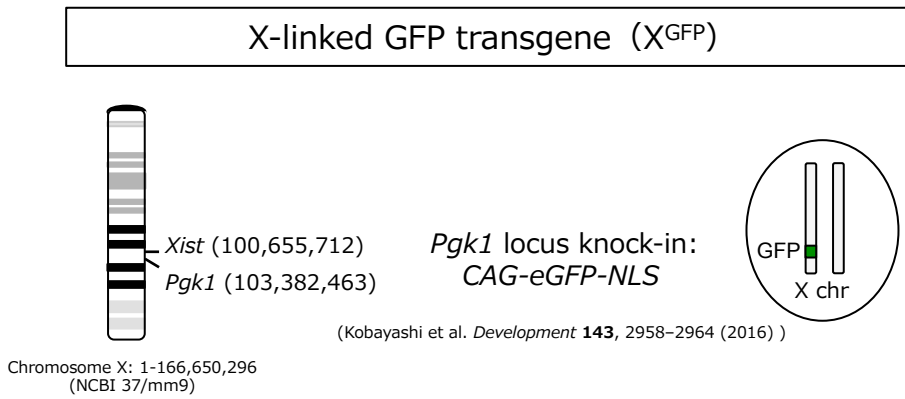**b**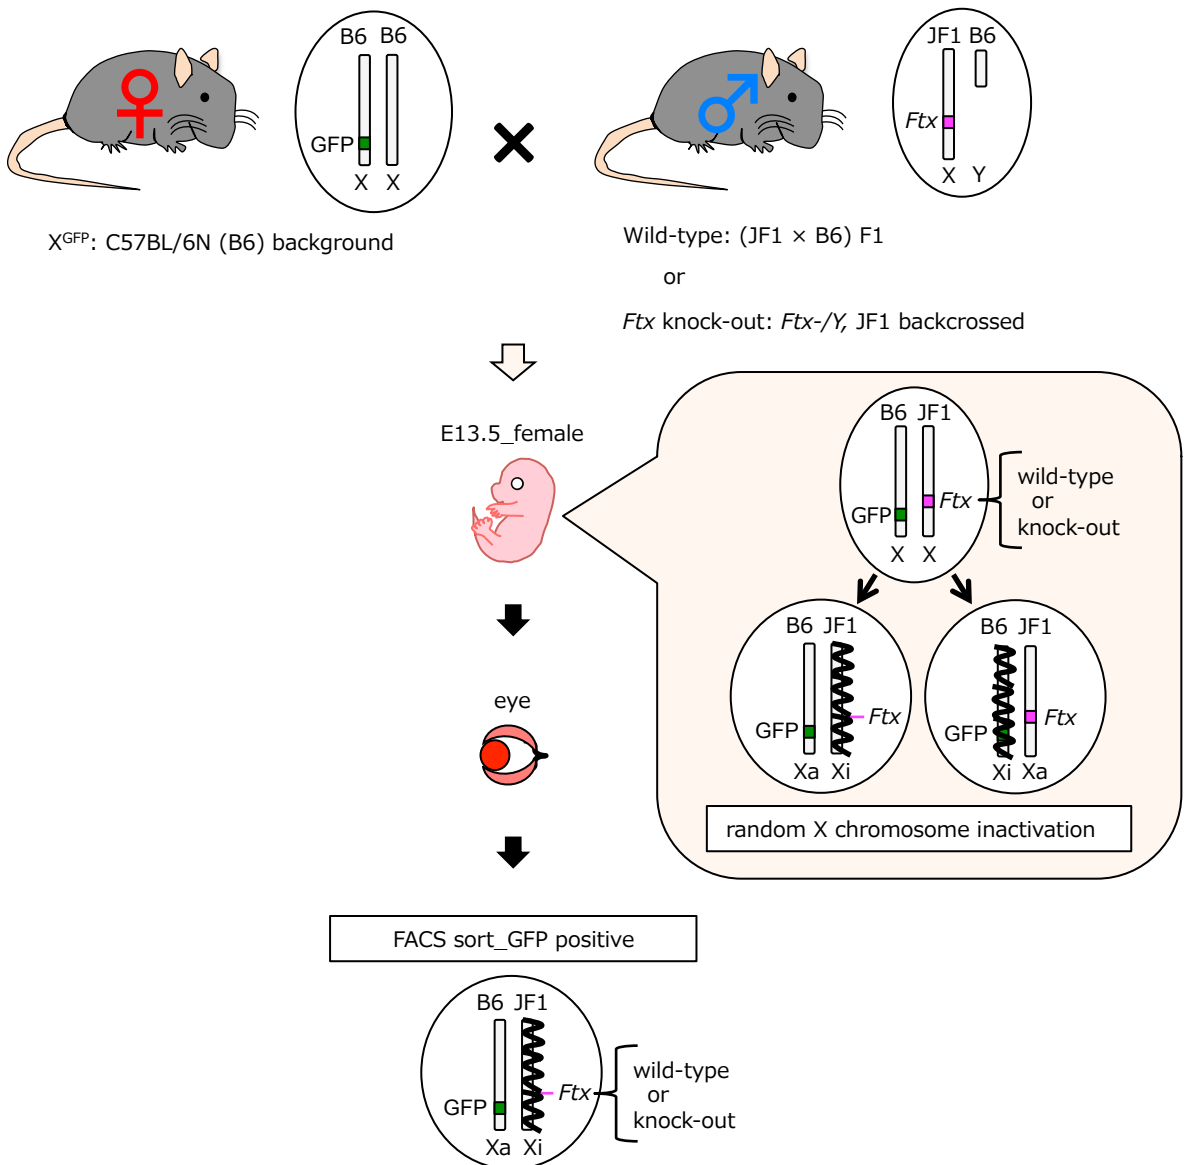

**Supplementary Figure 5. Allelic expression analysis following random XCI at E13.5 eyes.**

(a) The gene encoding the reporter protein eGFP was inserted into the *Pgf1* locus on X chromosomes ( $X^{GFP}$  mouse). (b) Scheme of the allelic expression analysis to confirm the impairment of random XCI in heterozygous *Ftx*<sup>+/-</sup> eyes.  $X^{GFP}$  mice with a *Mus musculus musculus* (C57BL/6N: B6) background and WT or *Ftx*<sup>-</sup>/Y mutant mice with a *Mus musculus molossinus* (JF1) background were crossed and F1 embryos were recovered for RFLP analysis.

**a**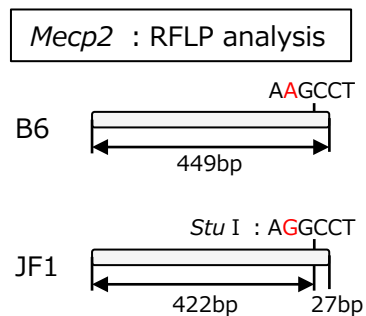**b**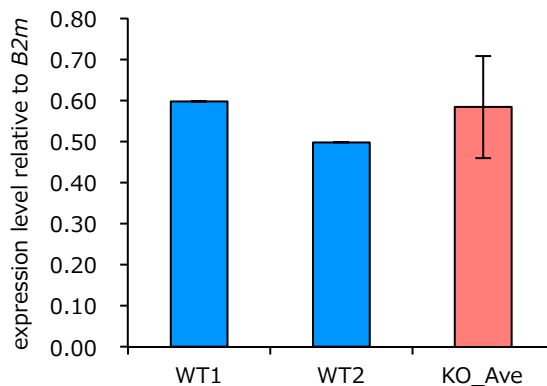**c**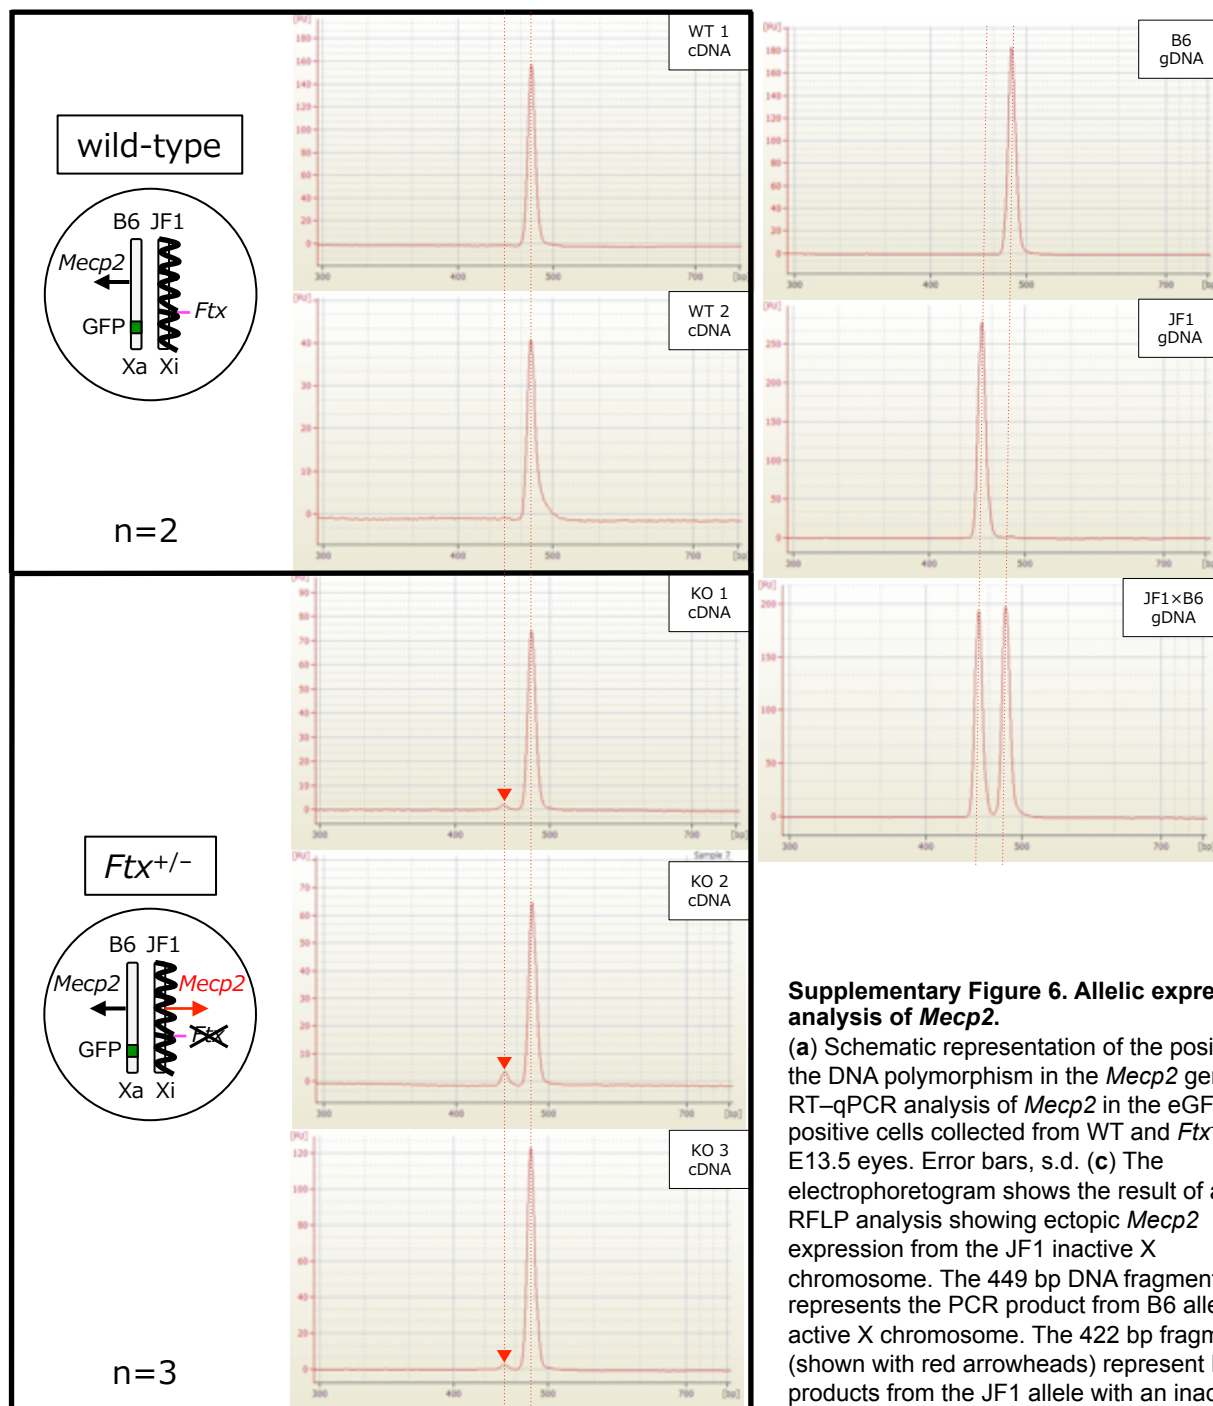

### Supplementary Figure 6. Allelic expression analysis of *Mecp2*.

(a) Schematic representation of the position of the DNA polymorphism in the *Mecp2* gene. (b) RT-qPCR analysis of *Mecp2* in the eGFP-positive cells collected from WT and *Ftx*<sup>+/-</sup> E13.5 eyes. Error bars, s.d. (c) The electrophoretogram shows the result of an RFLP analysis showing ectopic *Mecp2* expression from the JF1 inactive X chromosome. The 449 bp DNA fragment represents the PCR product from B6 allele: active X chromosome. The 422 bp fragments (shown with red arrowheads) represent PCR products from the JF1 allele with an inactive X chromosome.

**a**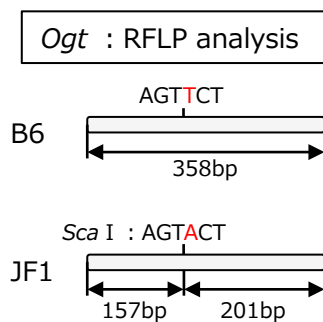**b**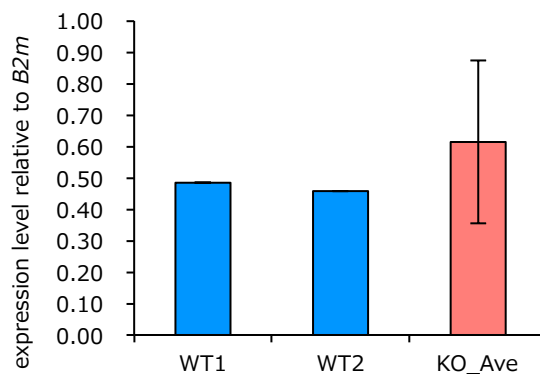**c**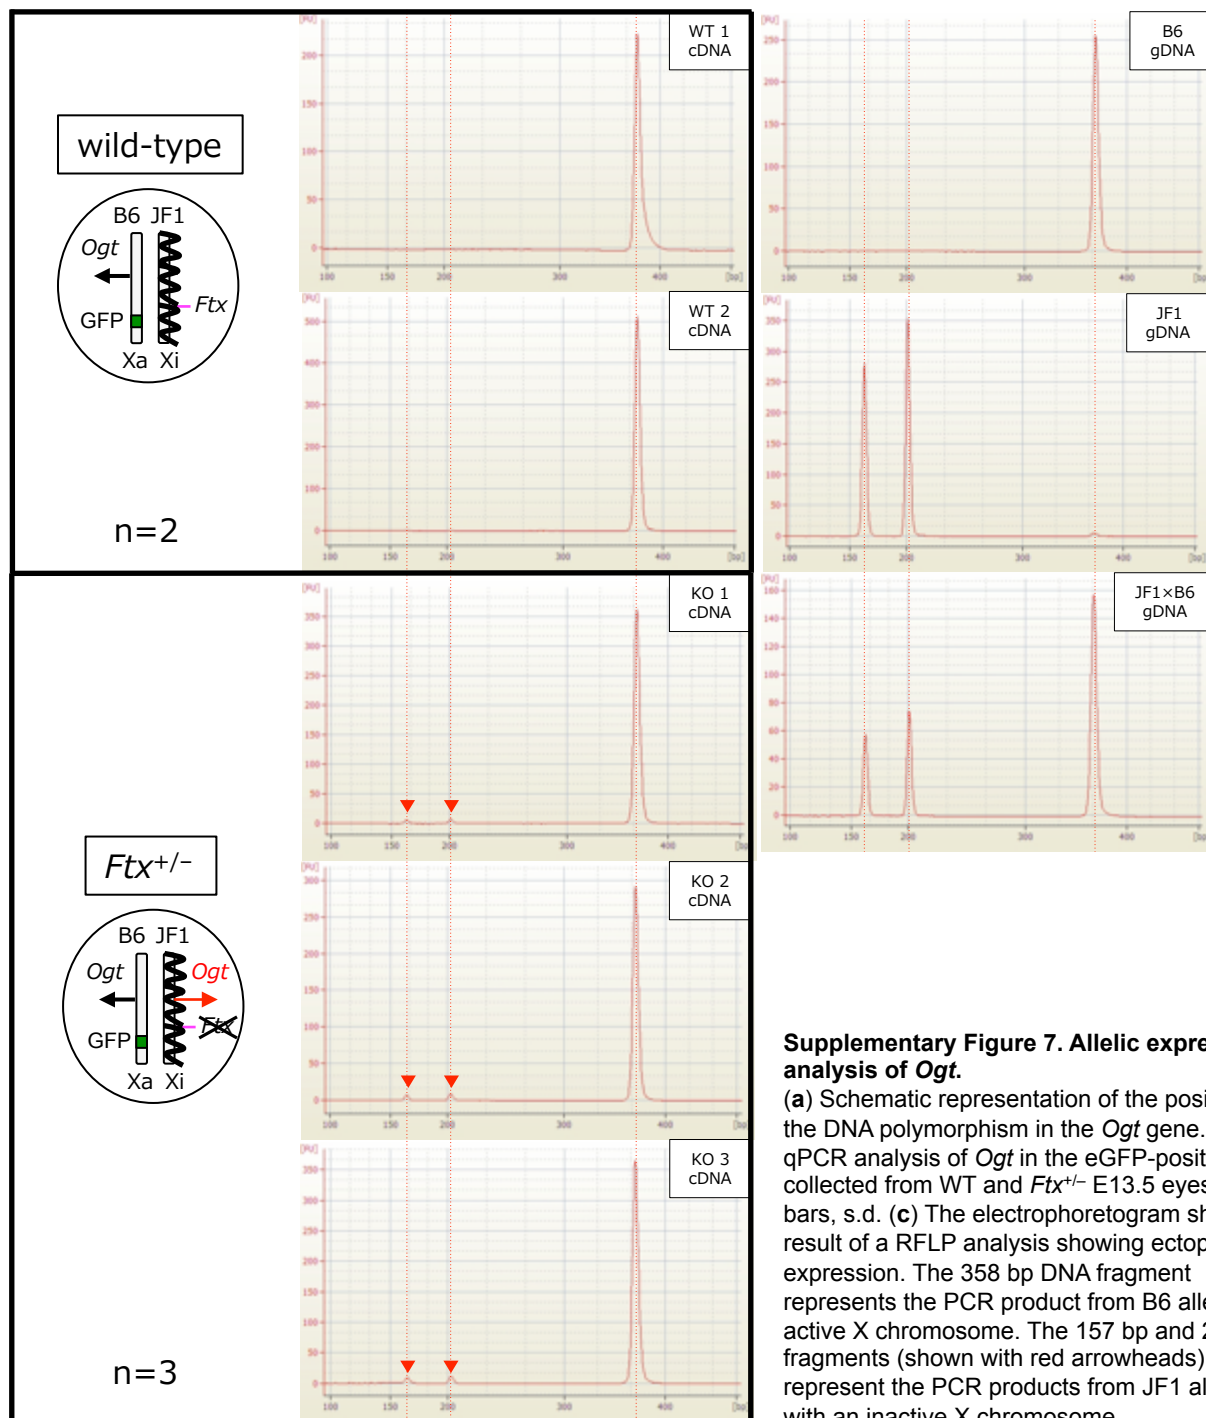

### Supplementary Figure 7. Allelic expression analysis of *Ogt*.

(a) Schematic representation of the position of the DNA polymorphism in the *Ogt* gene. (b) RT-qPCR analysis of *Ogt* in the eGFP-positive cells collected from WT and *Ftx*<sup>+/-</sup> E13.5 eyes. Error bars, s.d. (c) The electropherogram shows the result of a RFLP analysis showing ectopic *Ogt* expression. The 358 bp DNA fragment represents the PCR product from B6 allele: the active X chromosome. The 157 bp and 201 bp fragments (shown with red arrowheads) represent the PCR products from JF1 alleles with an inactive X chromosome.



**a**

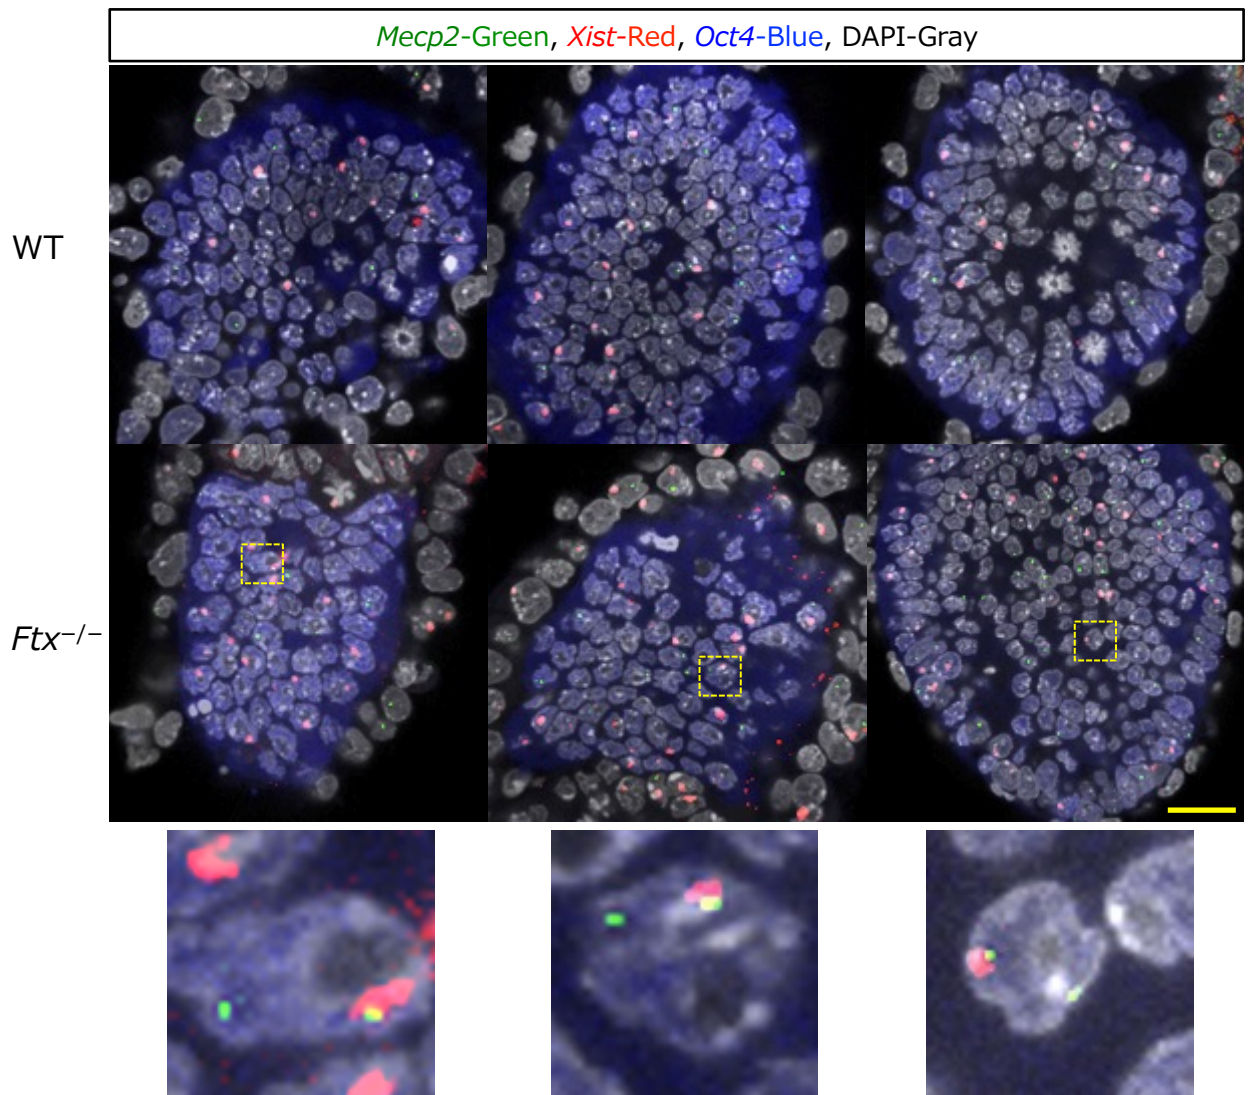

**b**

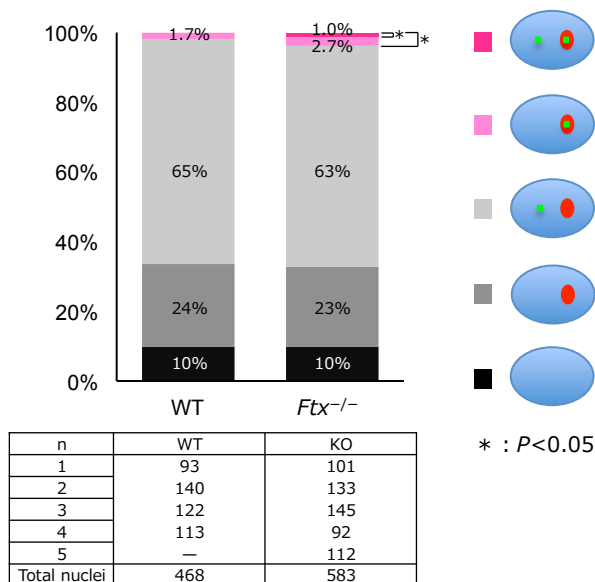

**Supplementary Figure 8. *Ftx*<sup>-/-</sup> mice showed partial failure of random XCI at E6.5.**

(a) RNA-FISH analysis of WT and *Ftx*<sup>-/-</sup> female embryos at E6.5, using *Xist* (red) and *Mecp2* (green) as probes. The epiblast lineage was stained with an anti-*Oct*-3/4 antibody (blue). The yellow boxed areas are shown enlarged in the lower panels. Scale bar = 20 mm. (b) Frequency of ectopic *Mecp2* expression from the inactive X chromosome at E6.5. Dark and light pink indicate cells showing ectopic *Mecp2* expression from the inactive X chromosome judged as a signal within the *Xist* cloud (the percentage of the cells labelled in dark pink showed signals from active X and inactive X; the percentage of the cells labelled in light pink showed signals from inactive X only). Optical sections of whole embryos were obtained using confocal microscopy Z-stacks and were used to reconstruct three-dimensional images for counting the RNA-FISH signals. At least 90 nuclei were counted for each sample, and statistically significant differences were detected between WT and *Ftx*<sup>-/-</sup> embryos using Chi-squared tests ( $*P < .05$ ).

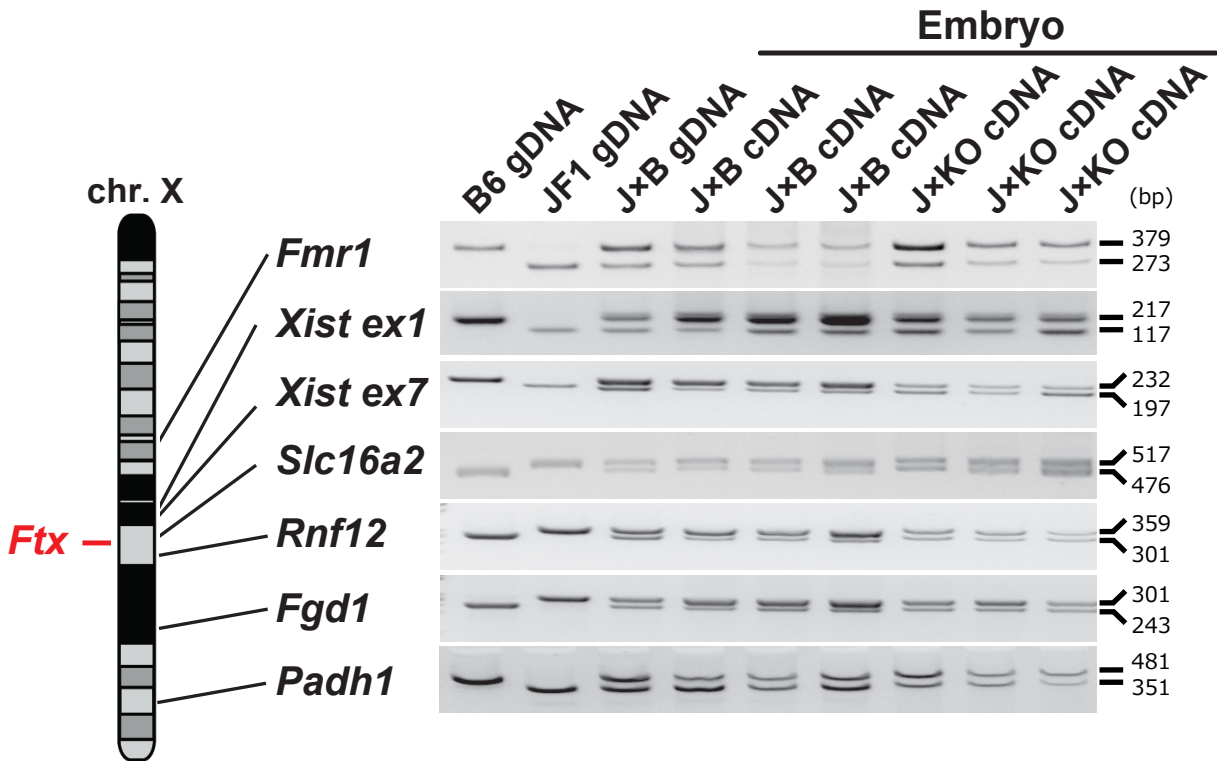

**Supplementary Figure 9. Allelic expression analysis of X-linked genes in *Ftx*<sup>+/-</sup> postimplantation embryos (E9.5).** Polymorphisms in X-linked genes between WT JF1 and *Ftx*-deficient B6 alleles were detected by RFLP analysis. The non-upregulated *Fmr1*, *Rnf12*, *Fgd1* and *Padh1* genes are known to be subjected to XCI. B6 gDNA, B6 genomic DNA; JF1 gDNA, JF1 genomic DNA; J × B gDNA, (JF1 × B6) F1 genomic DNA; J × B cDNA, JF1 × B6 RT-qPCR products; J × KO cDNA, JF1 × KO RT-qPCR products.

*Ftx*

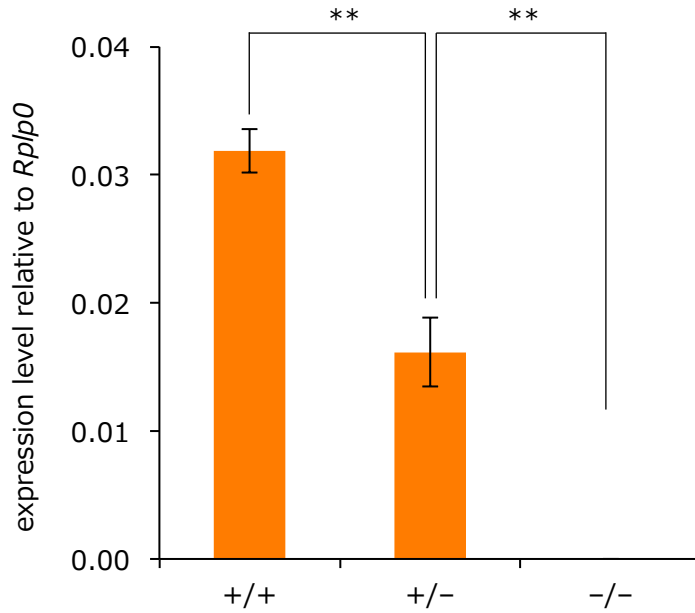

*Xist*

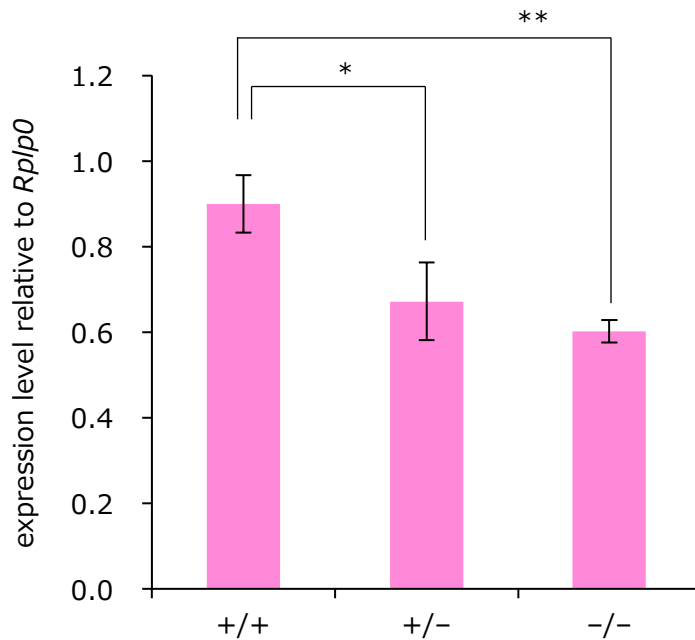

\* :  $P < 0.05$   
\* \* :  $P < 0.01$

**Supplementary Figure 10. RT-qPCR analysis of *Ftx* and *Xist* in WT females (+/+), heterozygous female (+/-) and homozygous female (-/-) eyes ( $n = 3$ , E13.5).** The PCR primers used in this analysis were as reported<sup>7</sup>. Significance levels of mean differences were calculated using a two-tailed, unequal variance *t*-test. Error bars, s.d. *Rplp0*: ribosomal protein, large at P0.

**a**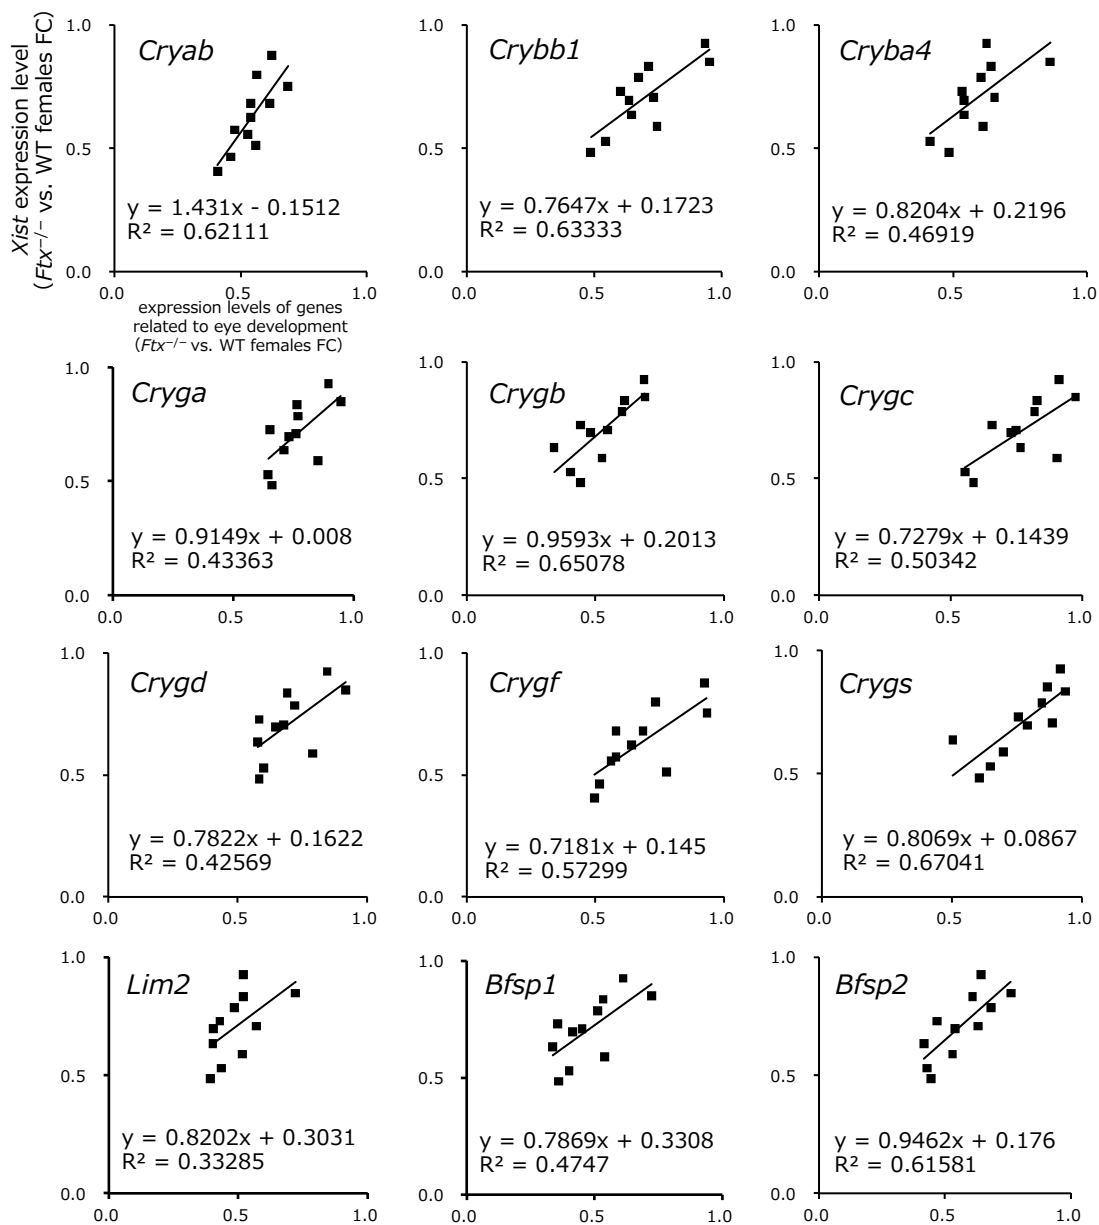**b**

| gene name     | human phenotypes         | mouse phenotypes         | references (mutant of mice)                       |
|---------------|--------------------------|--------------------------|---------------------------------------------------|
| <i>Cryab</i>  | cataract                 | microphthalmia, cataract | Andley UP, 2011 <sup>1</sup>                      |
| <i>Cryba4</i> | cataract                 | not determined           |                                                   |
| <i>Crybb1</i> | cataract                 | not determined           |                                                   |
| <i>Cryga</i>  | not determined           | microphthalmia, cataract | Graw J, 2004 <sup>2</sup>                         |
| <i>Crygb</i>  | cataract                 | cataract                 | Li L, 2008 <sup>3</sup>                           |
| <i>Crygc</i>  | microcornea, cataract    | microphthalmia, cataract | Graw J, 2002 <sup>4</sup>                         |
| <i>Crygd</i>  | microcornea, cataract    | lens smaller, cataract   | Graw J, 2002 <sup>5</sup>                         |
| <i>Crygf</i>  | not determined           | cataract                 | Graw J, 2002 <sup>6</sup>                         |
| <i>Crygs</i>  | cataract                 | cataract                 | Lei Bu, 2002 <sup>7</sup>                         |
| <i>Bfsp1</i>  | cataract                 | not determined           |                                                   |
| <i>Bfsp2</i>  | cataract                 | not determined           |                                                   |
| <i>Lim2</i>   | microphthalmia, cataract | microphthalmia, cataract | Steele EC Jr, 1997 <sup>8</sup> 2000 <sup>9</sup> |

Human phenotypes refer to the Human-Mouse MGI database. (<http://www.informatics.jax.org/humanDisease.shtml>)

**Supplementary Figure 11. Correlation between the expressions of *Xist* and autosomal genes with functions related to the Gene Ontology (GO) category “structural constituent of eye lens”.**

(a) In the eyes of female *Ftx*<sup>-/-</sup> mice ( $n = 11$ ), a correlation was found between the expression level of *Xist* and genes with functions related to this GO category. The Y axis shows *Xist* expression (*Ftx*<sup>-/-</sup> vs. WT females as FC values); the X axis shows the expression levels of each gene (*Ftx*<sup>-/-</sup> vs. WT females as FC values). (b) A list of the genes with functions related to structural constituents of the eye lens. Information on the phenotype of each mutant in mice and/or humans is also included.

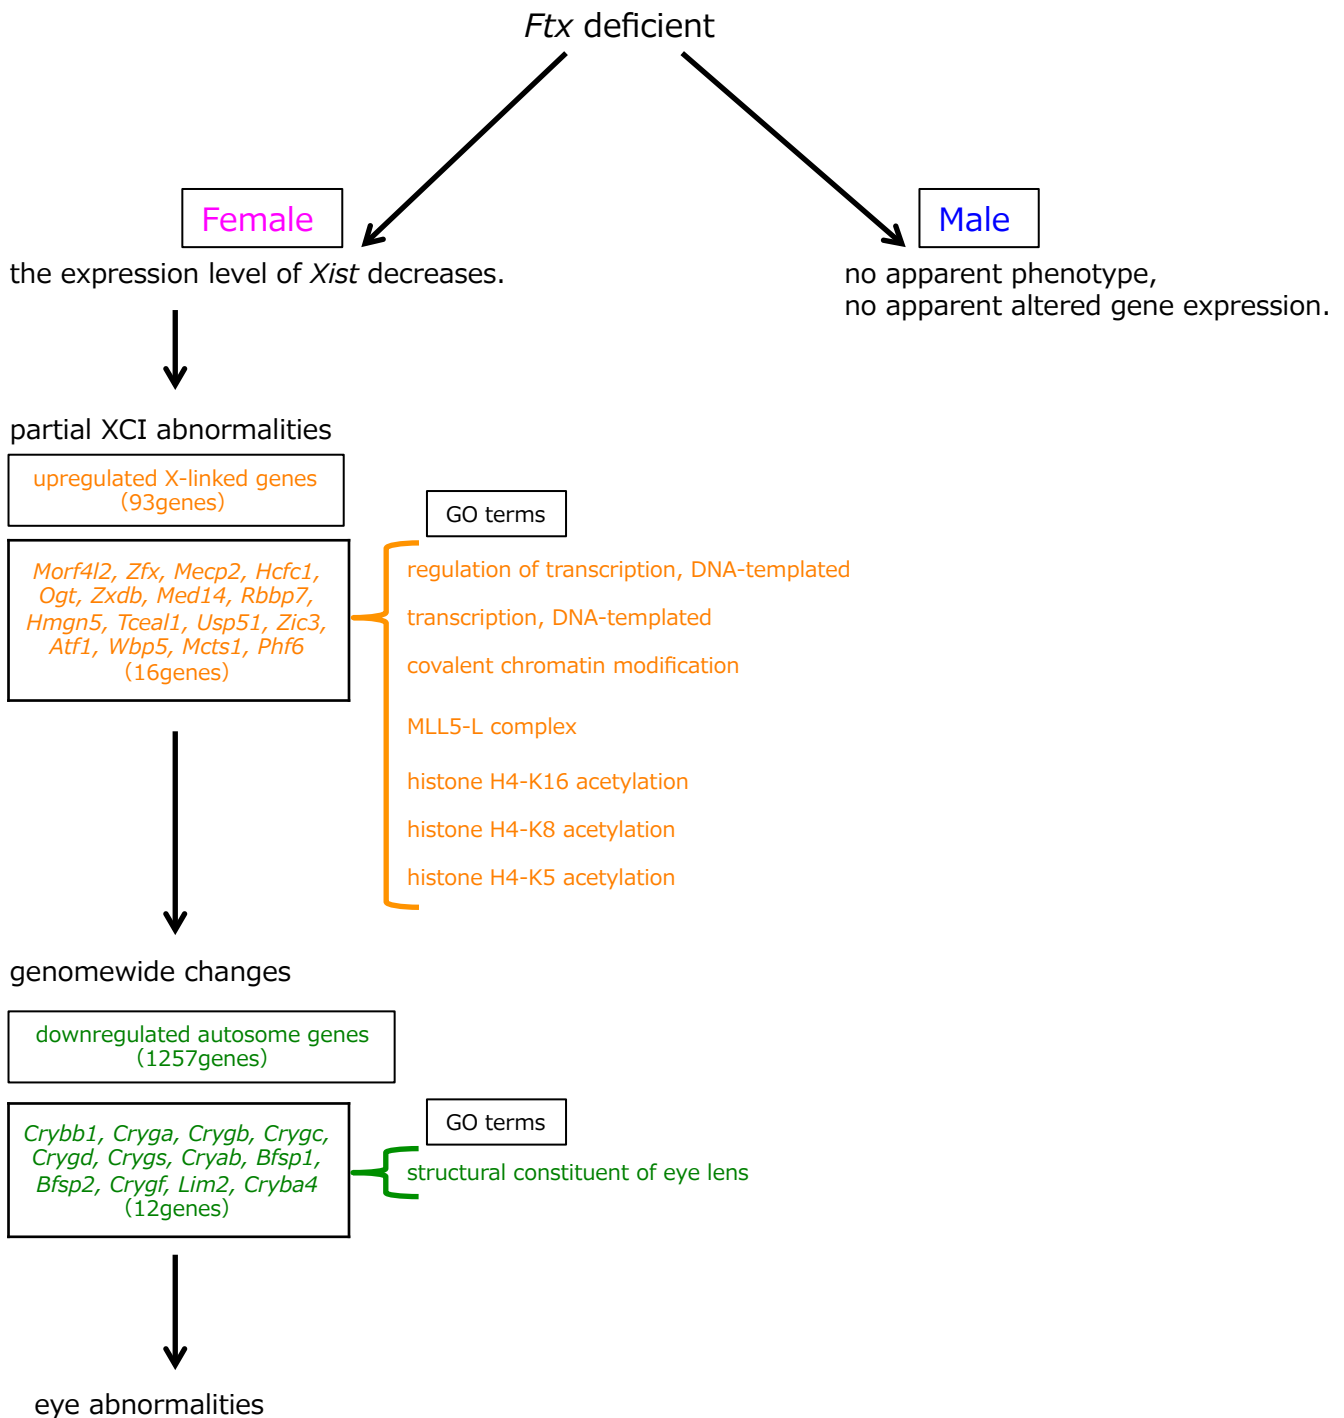

**Supplementary Figure 12. A model for the eye abnormalities resulting from *Ftx* functional loss.**

*Ftx* deficiency in female mice resulted in diminished expression of *Xist* and partial failure of XCI. GO analysis revealed that the upregulated X-linked genes showed significant enrichment of genetic pathways involved in the regulation of transcription (e.g., *Wbp5*, *Med14* and *Tceal1*) or in epigenetic control (e.g., *Hcfc1*, *Ogt* and *Mec*). Upregulated X-linked gene expression might result in alterations of the downstream expressions of autosomal genes. These autosomal alterations were barely detected in *Ftx*-deficient male mice (*Ftx*<sup>-/Y</sup>), suggesting that *Ftx* does not act in *trans* to regulate autosomal genes directly. Altered gene expressions in *Ftx*<sup>-/</sup> female mice involved some downregulated genes that are critical for normal eye development (e.g., *Crybb1*, *Ceyga* and *Bfsp1*). The expression levels of these eye-related genes were not changed in *Ftx*<sup>-/Y</sup> male mice, suggesting that these eye abnormalities were caused by a partial failure of XCI.

Supplementary Table 1. Mating of *Ftx*-deficient mice (#64)

| Cross<br>(♀ × ♂) | Male pups |     | Female pups |     | Total pups | Mean litter size |
|------------------|-----------|-----|-------------|-----|------------|------------------|
|                  | +/Y       | -/Y | +/-         | +/0 |            |                  |
| +/+ × -/Y        | 50        |     | 61          | 1   |            |                  |
|                  | 50        |     | 62          |     | 112        | 7.0              |
| chi-square=0.30  |           |     |             |     |            |                  |
| Cross<br>(♀ × ♂) | Male pups |     | Female pups |     | Total pups | Mean litter size |
|                  | +/Y       | -/Y | +/+         | -/+ |            |                  |
| +/- × +/Y        | 53        | 42  | 48          | 37  |            |                  |
|                  | 95        |     | 85          |     | 180        | 7.0              |
| chi-square=0.61  |           |     |             |     |            |                  |
| Cross<br>(♀ × ♂) | Male pups |     | Female pups |     | Total pups | Mean litter size |
|                  | +/Y       | -/Y | +/-         | -/- |            |                  |
| +/- × -/Y        | 30        | 31  | 29          | 25  |            |                  |
|                  | 61        |     | 54          |     | 115        | 6.4              |
| chi-square=0.87  |           |     |             |     |            |                  |
| Cross<br>(♀ × ♂) | Male pups |     | Female pups |     | Total pups | Mean litter size |
|                  | -/Y       |     | -/-         |     |            |                  |
| -/- × -/Y        | 56        |     | 62          |     | 118        | 6.9              |
| chi-square=0.58  |           |     |             |     |            |                  |

Supplementary Table 2. Mating of *miRNA314/421* -deficient mice

| Cross<br>(♀ × ♂) | Male pups |     | Female pups |     | Total pups | Mean litter size |
|------------------|-----------|-----|-------------|-----|------------|------------------|
|                  | +/Y       | -/Y | +/-         | +/0 |            |                  |
| +/+ × -/Y        | 16        |     | 24          | 1   | 41         | 8.2              |

| Cross<br>(♀ × ♂) | Male pups |     | Female pups |     | Total pups | Mean litter size |
|------------------|-----------|-----|-------------|-----|------------|------------------|
|                  | +/Y       | -/Y | +/+         | -/+ |            |                  |
| +/- × +/Y        | 32        | 33  | 35          | 33  | 133        | 7.8              |
|                  | 65        |     | 68          |     |            |                  |

| Cross<br>(♀ × ♂) | Male pups |     | Female pups |     | Total pups | Mean litter size |
|------------------|-----------|-----|-------------|-----|------------|------------------|
|                  | +/Y       | -/Y | +/-         | -/- |            |                  |
| +/- × -/Y        | 22        | 16  | 12          | 15  | 65         | 8.3              |
|                  | 38        |     | 27          |     |            |                  |

| Cross<br>(♀ × ♂) | Male pups |     | Female pups |     | Total pups | Mean litter size |
|------------------|-----------|-----|-------------|-----|------------|------------------|
|                  | +/Y       | -/Y | +/-         | -/- |            |                  |
| -/- × -/Y        | 27        |     | 32          |     | 59         | 7.4              |



Supplementary Table 3. Gene Ontology analysis for X-linked Up-regulation genes (P&lt;0.05, Non-adjusted p-value) .

| Category                  | Term                                                                                      | Count                     | %         | PValue    | Genes                         | List Total                     | Pop Hits | Pop Total | Fold Enrichment | Bonferroni | Benjamini | FDR       |           |
|---------------------------|-------------------------------------------------------------------------------------------|---------------------------|-----------|-----------|-------------------------------|--------------------------------|----------|-----------|-----------------|------------|-----------|-----------|-----------|
| Biological Process        | GO:0006355~regulation of transcription, DNA-templated                                     | 15                        | 22.058824 | 0.0022496 | MORF4L2, ZFX, MECP2, HCFC1, Z | 50                             | 2279     | 18082     | 2.380           | 0.521184   | 0.521184  | 3.0030048 |           |
|                           | GO:0006351~transcription, DNA-templated                                                   | 13                        | 19.117647 | 0.0037426 | WBP5, MORF4L2, ZFX, MECP2, Z  | 50                             | 1885     | 18082     | 2.494           | 0.7065751  | 0.4583129 | 4.9497626 |           |
|                           | GO:0016569~covalent chromatin modification                                                | 5                         | 7.3529412 | 0.0057723 | MORF4L2, HCFC1, OGT, HMGNS, I | 50                             | 266      | 18082     | 6.798           | 0.8493806  | 0.4679404 | 7.5381752 |           |
|                           | GO:1901911~adenosine 5'-(hexahydrogen pentaphosphate) catabolic process                   | 2                         | 2.9411765 | 0.0107964 | NUDT10, NUDT11                | 50                             | 4        | 18082     | 180.820         | 0.9712646  | 0.5882778 | 13.667347 |           |
|                           | GO:1901907~diadenosine pentaphosphate catabolic process                                   | 2                         | 2.9411765 | 0.0107964 | NUDT10, NUDT11                | 50                             | 4        | 18082     | 180.820         | 0.9712646  | 0.5882778 | 13.667347 |           |
|                           | GO:0071543~diphosphoinositol polyphosphate metabolic process                              | 2                         | 2.9411765 | 0.0107964 | NUDT10, NUDT11                | 50                             | 4        | 18082     | 180.820         | 0.9712646  | 0.5882778 | 13.667347 |           |
|                           | GO:1901909~diadenosine hexaphosphate catabolic process                                    | 2                         | 2.9411765 | 0.0107964 | NUDT10, NUDT11                | 50                             | 4        | 18082     | 180.820         | 0.9712646  | 0.5882778 | 13.667347 |           |
|                           | GO:0006357~regulation of transcription from RNA polymerase II promoter                    | 5                         | 7.3529412 | 0.0223119 | WBP5, MED14, HMGNS, TCEAL1,   | 50                             | 397      | 18082     | 4.555           | 0.9993755  | 0.7713874 | 26.323888 |           |
|                           | GO:0043984~histone H4-K16 acetylation                                                     | 2                         | 2.9411765 | 0.0372904 | HCFC1, OGT                    | 50                             | 14       | 18082     | 51.663          | 0.999996   | 0.8739641 | 40.220688 |           |
|                           | GO:0043982~histone H4-K8 acetylation                                                      | 2                         | 2.9411765 | 0.0425051 | HCFC1, OGT                    | 50                             | 16       | 18082     | 45.205          | 0.9999993  | 0.8685373 | 44.458774 |           |
|                           | GO:0043981~histone H4-K5 acetylation                                                      | 2                         | 2.9411765 | 0.0425051 | HCFC1, OGT                    | 50                             | 16       | 18082     | 45.205          | 0.9999993  | 0.8685373 | 44.458774 |           |
|                           | Cellular Component                                                                        | GO:0005634~nucleus        | 31        | 45.588235 | 6.29E-04                      | MORF4L2, POLA1, VBP1, HCFC1, ; | 59       | 6019      | 19662           | 1.716      | 0.0674371 | 0.0674371 | 0.7093149 |
|                           |                                                                                           | GO:0005654~nucleoplasm    | 13        | 19.117647 | 0.0098167                     | CSTF2, SYAP1, MORF4L2, POLA1,  | 59       | 1935      | 19662           | 2.239      | 0.6654743 | 0.4216181 | 10.563915 |
|                           |                                                                                           | GO:0005884~actin filament | 3         | 4.4117647 | 0.0171989                     | AMOT, PLS3, GPPD2              | 59       | 68        | 19662           | 14.702     | 0.8542238 | 0.4737054 | 17.826284 |
| GO:0070688~MLL5-L complex |                                                                                           | 2                         | 2.9411765 | 0.0262428 | HCFC1, OGT                    | 59                             | 9        | 19662     | 74.056          | 0.9477575  | 0.5219141 | 25.989221 |           |
| GO:0005730~nucleolus      |                                                                                           | 7                         | 10.294118 | 0.0371223 | MORF4L2, POLA1, HAUS7, HMGN!  | 59                             | 842      | 19662     | 2.771           | 0.9849895  | 0.5682033 | 34.826225 |           |
| Molecular Function        | GO:0052843~inositol-1-diphosphate-2,3,4,5,6-pentakisphosphate diphosphatase activity      | 2                         | 2.9411765 | 0.0111884 | NUDT10, NUDT11                | 50                             | 4        | 17446     | 174.460         | 0.757725   | 0.757725  | 12.216713 |           |
|                           | GO:0052847~inositol-1,5-bisdiphosphate-2,3,4,6-tetrakisphosphate 5-diphosphatase activity | 2                         | 2.9411765 | 0.0111884 | NUDT10, NUDT11                | 50                             | 4        | 17446     | 174.460         | 0.757725   | 0.757725  | 12.216713 |           |
|                           | GO:0000298~endopolyphosphatase activity                                                   | 2                         | 2.9411765 | 0.0111884 | NUDT10, NUDT11                | 50                             | 4        | 17446     | 174.460         | 0.757725   | 0.757725  | 12.216713 |           |
|                           | GO:0052848~inositol-3,5-bisdiphosphate-2,3,4,6-tetrakisphosphate 5-diphosphatase activity | 2                         | 2.9411765 | 0.0111884 | NUDT10, NUDT11                | 50                             | 4        | 17446     | 174.460         | 0.757725   | 0.757725  | 12.216713 |           |
|                           | GO:0052840~inositol diphosphate tetrakisphosphate diphosphatase activity                  | 2                         | 2.9411765 | 0.0111884 | NUDT10, NUDT11                | 50                             | 4        | 17446     | 174.460         | 0.757725   | 0.757725  | 12.216713 |           |
|                           | GO:0052846~inositol-1,5-bisdiphosphate-2,3,4,6-tetrakisphosphate 1-diphosphatase activity | 2                         | 2.9411765 | 0.0111884 | NUDT10, NUDT11                | 50                             | 4        | 17446     | 174.460         | 0.757725   | 0.757725  | 12.216713 |           |
|                           | GO:0052844~inositol-3-diphosphate-1,2,4,5,6-pentakisphosphate diphosphatase activity      | 2                         | 2.9411765 | 0.0111884 | NUDT10, NUDT11                | 50                             | 4        | 17446     | 174.460         | 0.757725   | 0.757725  | 12.216713 |           |
|                           | GO:0008486~diphosphoinositol-polyphosphate diphosphatase activity                         | 2                         | 2.9411765 | 0.0111884 | NUDT10, NUDT11                | 50                             | 4        | 17446     | 174.460         | 0.757725   | 0.757725  | 12.216713 |           |
|                           | GO:0034431~bis(5'-adenosyl)-hexaphosphatase activity                                      | 2                         | 2.9411765 | 0.0111884 | NUDT10, NUDT11                | 50                             | 4        | 17446     | 174.460         | 0.757725   | 0.757725  | 12.216713 |           |
|                           | GO:0052845~inositol-5-diphosphate-1,2,3,4,6-pentakisphosphate diphosphatase activity      | 2                         | 2.9411765 | 0.0111884 | NUDT10, NUDT11                | 50                             | 4        | 17446     | 174.460         | 0.757725   | 0.757725  | 12.216713 |           |
|                           | GO:0034432~bis(5'-adenosyl)-pentaphosphatase activity                                     | 2                         | 2.9411765 | 0.0111884 | NUDT10, NUDT11                | 50                             | 4        | 17446     | 174.460         | 0.757725   | 0.757725  | 12.216713 |           |
|                           | GO:0043996~histone acetyltransferase activity (H4-K8 specific)                            | 2                         | 2.9411765 | 0.0277414 | HCFC1, OGT                    | 50                             | 10       | 17446     | 69.784          | 0.971126   | 0.8300766 | 27.805316 |           |
|                           | GO:0046972~histone acetyltransferase activity (H4-K16 specific)                           | 2                         | 2.9411765 | 0.0277414 | HCFC1, OGT                    | 50                             | 10       | 17446     | 69.784          | 0.971126   | 0.8300766 | 27.805316 |           |
|                           | GO:0043995~histone acetyltransferase activity (H4-K5 specific)                            | 2                         | 2.9411765 | 0.0277414 | HCFC1, OGT                    | 50                             | 10       | 17446     | 69.784          | 0.971126   | 0.8300766 | 27.805316 |           |
|                           | GO:0050072~m7G(5')pppN diphosphatase activity                                             | 2                         | 2.9411765 | 0.0304737 | NUDT10, NUDT11                | 50                             | 11       | 17446     | 63.440          | 0.9797461  | 0.7274145 | 30.120261 |           |
|                           | GO:0003682~chromatin binding                                                              | 5                         | 7.3529412 | 0.0414343 | MECP2, POLA1, HCFC1, HMGNS, S | 50                             | 466      | 17446     | 3.744           | 0.9951654  | 0.7363124 | 38.741053 |           |



Supplementary Table 4. Gene Ontology analysis for Autosome Up-regulation genes (P&lt;0.01, Bonferroni adjusted p-value) .

| Category                                                   | Term                                                                | Count     | %         | PValue                          | Genes                            | List Total | Pop Hits | Pop Total | Fold Enrichment | Bonferroni | Benjamini | FDR       |
|------------------------------------------------------------|---------------------------------------------------------------------|-----------|-----------|---------------------------------|----------------------------------|------------|----------|-----------|-----------------|------------|-----------|-----------|
| Biological Process                                         | GO:0007049~cell cycle                                               | 85        | 6.6510172 | 1.75E-12                        | ITGB3BP, SPIN1, E2F3, LZTS2, CDC | 1100       | 614      | 18082     | 2.276           | 6.42E-09   | 6.42E-09  | 3.22E-09  |
|                                                            | GO:0006355~regulation of transcription, DNA-templated               | 208       | 16.27543  | 7.68E-10                        | ITGB3BP, MEF2A, SNIP1, RORB, RE  | 1100       | 2279     | 18082     | 1.500           | 2.82E-06   | 1.41E-06  | 1.41E-06  |
|                                                            | GO:0006397~mRNA processing                                          | 50        | 3.9123631 | 2.50E-09                        | SRSF1, SRSF10, STRAP, PNPT1, SNI | 1100       | 322      | 18082     | 2.553           | 9.16E-06   | 3.05E-06  | 4.60E-06  |
|                                                            | GO:0006351~transcription, DNA-templated                             | 176       | 13.771518 | 4.32E-09                        | MORF4L1, ITGB3BP, MEF2A, ARNT2   | 1100       | 1885     | 18082     | 1.535           | 1.58E-05   | 3.96E-06  | 7.95E-06  |
|                                                            | GO:0008380~RNA splicing                                             | 40        | 3.1298905 | 1.93E-08                        | SRSF1, SRSF10, STRAP, SNRPB2, C  | 1100       | 241      | 18082     | 2.728           | 7.09E-05   | 1.42E-05  | 3.56E-05  |
|                                                            | GO:0007067~mitotic nuclear division                                 | 43        | 3.3646322 | 3.81E-08                        | HAUS4, ITGB3BP, LZTS2, HAUS1, C  | 1100       | 277      | 18082     | 2.552           | 1.40E-04   | 2.33E-05  | 7.01E-05  |
|                                                            | GO:0051301~cell division                                            | 52        | 4.0688576 | 4.95E-08                        | ITGB3BP, LZTS2, CDC14A, AURKA,   | 1100       | 374      | 18082     | 2.286           | 1.82E-04   | 2.59E-05  | 9.12E-05  |
|                                                            | GO:0051028~mRNA transport                                           | 21        | 1.6431925 | 2.33E-07                        | SRSF1, XPO1, MYO1C, KIF5C, HNRN  | 1100       | 88       | 18082     | 3.923           | 8.56E-04   | 1.07E-04  | 4.30E-04  |
|                                                            | GO:0000122~negative regulation of transcription from RNA polymerase | 78        | 6.1032864 | 1.37E-06                        | BMI1, XPO1, MEF2A, HMGN2, E2F7,  | 1100       | 729      | 18082     | 1.759           | 0.0050258  | 5.60E-04  | 2.53E-03  |
|                                                            | GO:0005634~nucleus                                                  | 584       | 45.696401 | 8.39E-48                        | RPL17, MEF2A, PPP2R5C, RORB, RE  | 1158       | 6019     | 19662     | 1.647           | 5.88E-45   | 5.88E-45  | 1.27E-44  |
| Cellular Component                                         | GO:0005737~cytoplasm                                                | 556       | 43.505477 | 1.98E-25                        | MEF2A, RPL14, CLK1, ACBD6, CTNF  | 1158       | 6631     | 19662     | 1.424           | 1.39E-22   | 6.94E-23  | 2.99E-22  |
|                                                            | GO:0005654~nucleoplasm                                              | 224       | 17.527387 | 4.20E-24                        | ITGB3BP, RAD51C, MEF2A, SNIP1,   | 1158       | 1935     | 19662     | 1.966           | 2.94E-21   | 9.79E-22  | 6.33E-21  |
|                                                            | GO:0005730~nucleolus                                                | 109       | 8.5289515 | 1.00E-14                        | XPO1, SRP19, SETX, ESF1, CUL2, W | 1158       | 842      | 19662     | 2.198           | 6.99E-12   | 1.75E-12  | 1.51E-11  |
|                                                            | GO:0005829~cytosol                                                  | 166       | 12.989045 | 2.04E-09                        | TBK1, AP1G1, VPS54, BTRC, FOXO1  | 1158       | 1784     | 19662     | 1.580           | 1.43E-06   | 2.85E-07  | 3.07E-06  |
|                                                            | GO:0043231~intracellular membrane-bounded organelle                 | 80        | 6.2597809 | 3.51E-07                        | PTGES3, XPO1, GPBP1, AP1G1, FOX  | 1158       | 751      | 19662     | 1.809           | 2.46E-04   | 4.10E-05  | 5.29E-04  |
|                                                            | GO:0030529~intracellular ribonucleoprotein complex                  | 44        | 3.4428795 | 3.62E-07                        | MYO5A, XPO1, RPL17, RPL14, SNRF  | 1158       | 320      | 19662     | 2.335           | 2.53E-04   | 3.62E-05  | 5.45E-04  |
|                                                            | GO:0005925~focal adhesion                                           | 50        | 3.9123631 | 4.80E-07                        | KIF22, GJA1, CLTC, IQGAP1, CTNNA | 1158       | 391      | 19662     | 2.171           | 3.36E-04   | 4.20E-05  | 7.23E-04  |
|                                                            | GO:0070062~extracellular exosome                                    | 212       | 16.588419 | 2.98E-06                        | RPL14, ATP1B3, LUZP1, CCT2, B2M  | 1158       | 2674     | 19662     | 1.346           | 0.0020833  | 2.32E-04  | 0.0044929 |
|                                                            | GO:0005913~cell-cell adherens junction                              | 41        | 3.2081377 | 4.14E-06                        | PARD3, CNN3, STK38, RPL14, SNX5  | 1158       | 316      | 19662     | 2.203           | 0.0028972  | 2.90E-04  | 0.0062506 |
|                                                            | GO:0005681~spliceosomal complex                                     | 24        | 1.8779343 | 4.30E-06                        | SRSF1, SREK1, SNRPB2, CWC15, HI  | 1158       | 136      | 19662     | 2.996           | 0.0030074  | 2.74E-04  | 0.0064887 |
| Molecular Function                                         | GO:0000932~cytoplasmic mRNA processing body                         | 17        | 1.3302034 | 4.92E-06                        | POLR2G, MEX3B, CNOT2, CNOT1, V   | 1158       | 74       | 19662     | 3.901           | 0.0034375  | 2.87E-04  | 0.0074182 |
|                                                            | GO:0005694~chromosome                                               | 43        | 3.3646322 | 6.06E-06                        | ITGB3BP, HMGB1, HMGB2, PPP2R5C   | 1158       | 344      | 19662     | 2.122           | 0.0042304  | 3.26E-04  | 0.0091327 |
|                                                            | GO:0005938~cell cortex                                              | 24        | 1.8779343 | 1.15E-05                        | PARD3, MAP2K1, FRYL, ARHGGEF7, F | 1158       | 144      | 19662     | 2.830           | 0.007993   | 5.73E-04  | 0.0172876 |
|                                                            | GO:0044822~poly(A) RNA binding                                      | 162       | 12.676056 | 4.37E-26                        | RPL17, RPL14, SNIP1, RBM5, CNOT  | 1064       | 1113     | 17446     | 2.387           | 4.69E-23   | 4.69E-23  | 6.97E-23  |
|                                                            | GO:0005515~protein binding                                          | 368       | 28.794992 | 9.97E-18                        | HMGN1, RAD51C, RPL17, MEF2A, A   | 1064       | 4092     | 17446     | 1.475           | 1.07E-14   | 5.34E-15  | 1.59E-14  |
|                                                            | GO:0003723~RNA binding                                              | 98        | 7.6682316 | 1.05E-11                        | XPO1, RBM5, SRP19, TARDBP, ZRS1  | 1064       | 780      | 17446     | 2.060           | 1.13E-08   | 3.75E-09  | 1.67E-08  |
|                                                            | GO:0003677~DNA binding                                              | 169       | 13.223787 | 4.44E-08                        | HMGN1, RAD51C, MEF2A, HMGN2,     | 1064       | 1847     | 17446     | 1.500           | 4.76E-05   | 1.19E-05  | 7.07E-05  |
|                                                            | GO:0061630~ubiquitin protein ligase activity                        | 34        | 2.6604069 | 1.38E-07                        | BTRC, UBE2V2, TRIM71, TRIM11, R  | 1064       | 199      | 17446     | 2.801           | 1.47E-04   | 2.95E-05  | 2.19E-04  |
|                                                            | GO:0003682~chromatin binding                                        | 58        | 4.5383412 | 3.90E-07                        | MORF4L1, HMGN1, BMI1, MEF2A, M   | 1064       | 466      | 17446     | 2.041           | 4.18E-04   | 6.97E-05  | 6.22E-04  |
|                                                            | GO:0003676~nucleic acid binding                                     | 119       | 9.3114241 | 5.70E-07                        | TBK1, RBM5, REST, ZFP84, ZFP932  | 1064       | 1237     | 17446     | 1.577           | 6.11E-04   | 8.73E-05  | 9.09E-04  |
| GO:0046872~metal ion binding                               | 267                                                                 | 20.892019 | 9.70E-07  | PDP1, RORB, EPT1, REST, ITS1, Z | 1064                             | 3355       | 17446    | 1.305     | 1.04E-03        | 1.30E-04   | 1.55E-03  |           |
| GO:0004842~ubiquitin-protein transferase activity          | 44                                                                  | 3.4428795 | 1.45E-06  | HECW1, BTRC, FEM1B, TRIM71, TT  | 1064                             | 326        | 17446    | 2.213     | 0.0015584       | 1.73E-04   | 0.002319  |           |
| GO:0008134~transcription factor binding                    | 45                                                                  | 3.5211268 | 2.16E-06  | HMGB2, E2F5, SOX2, FOXO1, NFYC  | 1064                             | 342        | 17446    | 2.157     | 0.0023086       | 2.31E-04   | 0.0034366 |           |
| GO:0098641~cadherin binding involved in cell-cell adhesion | 39                                                                  | 3.0516432 | 2.72E-06  | CNN3, STK38, RPL14, SNX5, CAPZA | 1064                             | 279        | 17446    | 2.292     | 0.0029116       | 2.65E-04   | 0.0043355 |           |
| GO:0000166~nucleotide binding                              | 165                                                                 | 12.910798 | 5.74E-06  | RAD51C, STK38, TBK1, RASL2-9, R | 1064                             | 1936       | 17446    | 1.397     | 0.0061321       | 5.12E-04   | 0.0091455 |           |

Supplementary Table 5. Gene Ontology analysis for Autosome Down-regulation genes (P<0.01, Bonferroni adjusted p-value) .

| Category           | Term                                          | Count | %         | PValue   | Genes                            | List Total | Pop Hits | Pop Total | Fold Enrichment | Bonferroni | Benjamini | FDR       |
|--------------------|-----------------------------------------------|-------|-----------|----------|----------------------------------|------------|----------|-----------|-----------------|------------|-----------|-----------|
| Biological Process | GO:0051290~protein heterotetramerization      | 12    | 1.2698413 | 3.20E-06 | HIST4H4, HIST1H4K, HIST1H3C, H   | 768        | 47       | 18082     | 6.011           | 9.51E-03   | 9.51E-03  | 5.76E-03  |
|                    | GO:0005634~nucleus                            | 364   | 38.518519 | 1.62E-16 | SCAF1, S100A4, S100A6, PDLIM7, I | 827        | 6019     | 19662     | 1.438           | 6.53E-14   | 6.53E-14  | 1.67E-13  |
|                    | GO:0005737~cytoplasm                          | 364   | 38.518519 | 2.88E-10 | SYT1, RAB3GAP2, S100A6, PDLIM7   | 827        | 6631     | 19662     | 1.305           | 1.70E-07   | 8.48E-08  | 4.25E-07  |
| Cellular Component | GO:0005829~cytosol                            | 118   | 12.486772 | 7.18E-07 | EIF6, S100A6, STAT5B, PGAM2, HC  | 827        | 1784     | 19662     | 1.573           | 4.22E-04   | 1.41E-04  | 0.0010577 |
|                    | GO:0070062~extracellular exosome              | 160   | 16.931217 | 2.39E-06 | EIF6, S100A4, TSPO, S100A6, ALDH | 827        | 2674     | 19662     | 1.423           | 0.0014072  | 3.52E-04  | 0.0035271 |
|                    | GO:0005913~cell-cell adherens junction        | 33    | 3.4920635 | 4.19E-06 | SNX9, YWHAZ, CADM3, PARD3, HD    | 827        | 316      | 19662     | 2.483           | 0.0024613  | 4.93E-04  | 0.0061725 |
| Molecular Function | GO:0005212~structural constituent of eye lens | 12    | 1.2698413 | 1.38E-09 | CRYBB1, CRYGA, CRYGB, CRYGC, C   | 756        | 24       | 17446     | 11.538          | 1.22E-06   | 1.22E-06  | 2.15E-06  |
|                    | GO:0005515~protein binding                    | 244   | 25.820106 | 1.40E-08 | S100A4, SYT1, S100A6, CADM3, PE  | 756        | 4092     | 17446     | 1.376           | 1.24E-05   | 6.21E-06  | 2.18E-05  |

Supplementary Table 6. A list of the PCR primers used in this research.

|                                                       | gene name                     | primer name |                      | seqeuce (5' →3')                 |            |
|-------------------------------------------------------|-------------------------------|-------------|----------------------|----------------------------------|------------|
| Construction of <i>miRNA374/421</i> disruption vector | <i>Fas2</i> -L-F1+SpeI        | Forward     | 003                  | aaactagtagcaatcctcagaccaacga     |            |
|                                                       | <i>Fas2</i> -L-F2+SpeI        | Forward     | 004                  | aaactagtccaacatggatgctgcaga      |            |
|                                                       | <i>Fas2</i> -L-F3             | Forward     | 005                  | aaattccatgcataagagattataaa       |            |
|                                                       | <i>Fas2</i> -L-F4             | Forward     | 006                  | taaatgtaaccaagatctcagaaatgaa     |            |
|                                                       | <i>Fas2</i> -M-F2-As          | Forward     | 008                  | aaggcgcgccagctgcagaaataaggacgctg |            |
|                                                       | <i>Fas2</i> gF1               | Forward     | 057                  | ttctggagctatgagcagca             |            |
|                                                       | <i>Fas2</i> gR1               | Reverse     | 058                  | caactggagtggtgttctt              |            |
|                                                       | <i>Fas2</i> gF4               | Forward     | 059                  | tccagggatgacagtcacaa             |            |
|                                                       | <i>Fas2</i> gR5               | Reverse     | 060                  | cacagttgacctgaagccct             |            |
|                                                       | <i>Fas2</i> gR6               | Reverse     | 061                  | cccatgtaggaactcgatgattc          |            |
| Validation of recombination                           | <i>miRNA374/421</i> short arm | Forward     | 001                  | gccttctatcgccttctgacgagttcttc    |            |
|                                                       |                               | Reverse     | 024                  | agaaaacaagcgcaggaactct           |            |
|                                                       | <i>miRNA374/421</i> long arm  | Forward     | 041                  | gagtagaaggtggcgcgaag             |            |
|                                                       |                               | Reverse     | 042                  | cactagacactgcccaactaaac          |            |
| Genotyping                                            | <i>miRNA374/421</i>           | Forward     | 330                  | ccgcgaccatgagcacaac              |            |
|                                                       |                               | Forward     | 057                  | ttctggagctatgagcagca             |            |
|                                                       |                               | Reverse     | 061                  | cccatgtaggaactcgatgattc          |            |
| polymorphic analysis(RFLP)                            | <i>Xist</i> exon1             | Forward     | 105                  | ctaaaactcagcccgttcca             | SpeI       |
|                                                       |                               | Reverse     | 106                  | gcaaccccagcaatagtcac             |            |
|                                                       | <i>Xist</i> exon 7            | Forward     | 107                  | gcccaggtcacattatggtt             | SacI       |
|                                                       |                               | Reverse     | 108                  | ctccaatttctggctcaag              |            |
|                                                       | <i>Ftx</i>                    | Forward     | 116                  | gccatctgatgtcatggttg             | HpyCH4 III |
|                                                       |                               | Reverse     | 117                  | ggtgttggttctcttgctcc             |            |
|                                                       | <i>Rnf12</i>                  | Forward     | 094                  | ctggagagtcttcagatgatgga          | Hae III    |
|                                                       |                               | Reverse     | 091                  | ggtcggcacttctgtactgc             |            |
|                                                       | <i>Fmr1</i>                   | Forward     | 079                  | cttaacacttcagggcagg              | RsaI       |
|                                                       |                               | Reverse     | 080                  | ctccctgaactctgcatcc              |            |
|                                                       | <i>Fgd1</i>                   | Forward     | 084                  | tcacacaaagccacctaagc             | HhaI       |
|                                                       |                               | Reverse     | 085                  | attgactgcattggagtg               |            |
|                                                       | <i>Slc16a2</i>                | Forward     | 109                  | tgtacggctcacctcattagg            | BseRI      |
|                                                       |                               | Reverse     | 110                  | ggaagtggaagcattgttc              |            |
|                                                       | <i>Padh1</i>                  | Forward     | 086                  | ttccagcगतatgctgacttt             | TaqI       |
|                                                       |                               | Reverse     | 087                  | tggcaaggcatgaagtgata             |            |
| <i>Mecp2</i>                                          | Forward                       | 800         | cccatctcctcatgattgct | StuI                             |            |
|                                                       | Reverse                       | 794         | ggccgtgctagcaaagtaag |                                  |            |
| <i>Ogt</i>                                            | Forward                       | 795         | ttatgcagctggcaacaac  | ScaI                             |            |
|                                                       | Reverse                       | 799         | tcccctccacattaagcatc |                                  |            |

Supplementary Table 7. A list of the qPCR primers and probes used in this research.

|      | gene name         | primer name | sequenece (5' →3')      |
|------|-------------------|-------------|-------------------------|
| qPCR | <i>beta-actin</i> | Forward 051 | aagtgtgacgttgacatccg    |
|      |                   | Reverse 052 | gatccacatctgctggaagg    |
|      | <i>Ftx</i>        | Forward 207 | atcttctgctctctctt       |
|      |                   | Reverse 208 | tgtgtccagggctgtctgt     |
|      | <i>Xist</i>       | Forward 236 | cagagtagcggaggactgaagag |
|      |                   | Reverse 237 | gctggttcgtctatcttgtggg  |

  

|                                  | gene name       | Assay Name     | Assay ID |
|----------------------------------|-----------------|----------------|----------|
| qPCR_TaqMan MicroRNA Assay (ABI) | <i>miRNA374</i> | mmu-miR-374-5p | 001319   |
|                                  | <i>miRNA421</i> | mmu-miR-421-3p | 002700   |
|                                  | <i>miRNA295</i> | mmu-miR-295    | 000189   |

  

|                                         | gene name   | Assay ID      |
|-----------------------------------------|-------------|---------------|
| qPCR_TaqMan Gene Expression Assay (ABI) | <i>Xist</i> | Mm01232884_m1 |
|                                         | <i>B2m</i>  | Mm00437762_m1 |

  

|                                 | gene name      | primer + probe | sequenece (5' →3')                   |
|---------------------------------|----------------|----------------|--------------------------------------|
| qPCR_PrimeTime qPCR Assay (IDT) | <i>Tmem29</i>  | Forward        | GACCAGGACATACAGGAACATC (Sense)       |
|                                 |                | Probe          | AGGAACCAAGGCAGCATCAATAACCC (Sense)   |
|                                 |                | Reverse        | CTGCTTTCTGGTACTCTCTCAC (AntiSense)   |
|                                 | <i>Mecp2</i>   | Forward        | GGTTGTCTCCACTGCTACTTAC (Sense)       |
|                                 |                | Probe          | CATGGTCACCTACCTGTCAGTGGC (AntiSense) |
|                                 |                | Reverse        | GCTAACTTGGGTGCTGATCT (AntiSense)     |
|                                 | <i>Ogt</i>     | Forward        | ACAGAGGGCAGATTCAGATAAC (Sense)       |
|                                 |                | Probe          | AGCAATGGACTGGCGACTACACAG (Sense)     |
|                                 |                | Reverse        | CTCCGTTGCAGCCTTATTA (AntiSense)      |
|                                 | <i>Gab3</i>    | Forward        | CAAGACCACTTCCCGTACATTC (Sense)       |
|                                 |                | Probe          | TGAGGAAGAAATGCAGGTGTGGGT (Sense)     |
|                                 |                | Reverse        | CCATGGAATCTGCACCATCTT (AntiSense)    |
|                                 | <i>Slc16a2</i> | Forward        | TCCATCCCTGGACTTAAGAAGA (Sense)       |
|                                 |                | Probe          | CTCATTCTGCTCCTGGGCTTGAT (Sense)      |
|                                 |                | Reverse        | GGAAGAGGCAGACAACGATAAG (AntiSense)   |

## Supplemental references

1. Andley, U.P., Hamilton, P.D., Ravi, N. & Wehl, C.C. A knock-in mouse model for the R120G mutation of  $\alpha$ B-crystallin recapitulates human hereditary myopathy and cataracts. *PLoS One* **6**, e17671 (2011).
2. Graw, J. *et al.* Genetic and allelic heterogeneity of *Cryg* mutations in eight distinct forms of dominant cataract in the mouse. *Invest. Ophthalmol. Vis. Sci.* **45**, 1202–1213 (2004).
3. Li, L. *et al.* Dense nuclear cataract caused by the  $\gamma$ B-Crystallin S11R point mutation. *Invest. Ophthalmol. Vis. Sci.* **49**, 304–309 (2008).
4. Graw, J., Neuhauser-Klaus, A., Loster, J. & Favor, J. A 6-bp deletion in the *Crygc* gene leading to a nuclear and radial cataract in the mouse. *Invest. Ophthalmol. Vis. Sci.* **43**, 236–240 (2002).
5. Graw, J. *et al.* V76D mutation in a conserved gD-crystallin region leads to dominant cataracts in mice. *Mamm. Genome* **13**, 452–455 (2002).
6. Graw, J., Klopp, N., Nehauser-Klaus, A., Favor, J. & Löster, J. *Crygf*<sup>Rop</sup>: The first mutation in the *Crygf* gene causing a unique radial lens opacity. *Invest. Ophthalmol. Vis. Sci.* **43**, 2998–3002 (2002).
7. Bu, L. *et al.* The  $\gamma$ S-crystallin gene is mutated in autosomal recessive cataract in mouse. *Genomics* **80**, 38–44 (2002).
8. Steele, E.C., Jr. *et al.* Identification of a mutation in the MP19 gene, *Lim2*, in the cataractous mouse mutant *To3*. *Mol. Vis.* **3**, 9238094 (1997).
9. Steele, E.C., Jr. *et al.* *Lim2*<sup>To3</sup> transgenic mice establish a causative relationship between the mutation identified in the *lim2* gene and cataractogenesis in the *To3* mouse mutant. *Mol. Vis.* **6**, 85–94 (2000).
