# Supplementary material for: Female mice lacking Ftx lncRNA exhibit impaired X-chromosome inactivation and a microphthalmia-like phenotype
Source: PubMed Central journal article supplement (PMC6148026; doi:10.1038/s41467-018-06327-6), 2018-09-20
Supplement: 41467_2018_6327_MOESM3_ESM.pdf [file 41467_2018_6327_MOESM3_ESM.pdf]

**Description of Additional Supplementary Files:**

Supplementary Data 1: Microarray data of X-linked genes.

Supplementary Data 2: Microarray data of Autosomal genes.
